1 11 Jan 2018

2

3 **Warning SINEs: *Alu* elements, evolution of the human brain, and the spectrum of**  
4 **neurological disease**

5 Peter A. Larsen<sup>\*1,2</sup>, Kelsie E. Hunnicutt<sup>1</sup>, Roxanne J. Larsen<sup>3</sup>, Anne D. Yoder<sup>1,2</sup>, and Ann M.  
6 Saunders<sup>4</sup>

7

8 <sup>1</sup>Department of Biology, Duke University, Durham, NC 27712

9 <sup>2</sup>Duke Lemur Center, Duke University, Durham, NC 27712

10 <sup>3</sup>Duke University School of Medicine, Duke University, Durham, NC 27710

11 <sup>4</sup>Zinfandel Pharmaceuticals, Inc., Research Triangle Park, NC 27709

12

13 **Running title:** *Alu* elements and the spectrum of neurological disease

14

15 **\*Corresponding Author:**

16 Peter A. Larsen

17 130 Science Drive, Box 90338

18 Department of Biology

19 Duke University

20 Durham, NC 27708

21 Office phone: 1-919-613-8727

22 peter.larsen@duke.edu

23

24

25

26 **Abstract**

27 *Alu* elements are a highly successful family of primate-specific retrotransposons that have  
28 fundamentally shaped primate evolution, including the evolution of our own species. *Alus*  
29 play critical roles in the formation of neurological networks and the epigenetic regulation of  
30 biochemical processes throughout the central nervous system (CNS), and thus are  
31 hypothesized to have contributed to the origin of human cognition. Despite the benefits that  
32 *Alus* provide, deleterious *Alu* activity is associated with a number of neurological and  
33 neurodegenerative disorders. In particular, neurological networks are potentially vulnerable  
34 to the epigenetic dysregulation of *Alu* elements operating across the suite of nuclear-encoded  
35 mitochondrial genes that are critical for both mitochondrial and CNS function. Here, we  
36 highlight the beneficial neurological aspects of *Alu* elements as well as their potential to  
37 cause disease by disrupting key cellular processes across the CNS. We identify at least 37  
38 neurological and neurodegenerative disorders wherein deleterious *Alu* activity has been  
39 implicated as a contributing factor for the manifestation of disease and, for many of these  
40 disorders, this activity is operating on genes that are essential for proper mitochondrial  
41 function. We conclude that the epigenetic dysregulation of *Alu* elements can ultimately  
42 disrupt mitochondrial homeostasis within the CNS. This mechanism is a plausible source for  
43 the incipient neuronal stress that is consistently observed across a spectrum of sporadic  
44 neurological and neurodegenerative disorders.

45

46 **Keywords:** A-to-I editing, Alzheimer's disease, brain connectome, epigenetics,  
47 mitochondria, mosaic brain

48

49

50

51 **List of Abbreviations:**

52 A-to-I: adenosine-to-inosine

53 AD: Alzheimer's Disease

54 ADAR: adenosine deaminase acting on RNA

55 ALS: Amyotrophic Lateral Sclerosis

56 AMPA:  $\alpha$ -amino-3-hydroxy-5methyl-4-isoxazole propionate

57 APP: amyloid precursor protein

58 circRNAs: circular RNAs

59 CNS: central nervous system

60 FLAM: free left *Alu* monomer

61 LINE: long interspersed element

62 L1: long interspersed element-1

63 LTR: long-terminal repeat

64 mRNA: messenger RNA

65 PD: Parkinson's Disease

66 pre-mRNA: precursor messenger RNA

67 SEDs: super-enhancer domains

68 SINE: short-interspersed element

69 TADs: topologically associating domains

70 TOMM: translocase of outer mitochondrial membrane

71

72 **Introduction**

73 Retrotransposons are mobile genetic elements that utilize an RNA intermediate to

74 copy and paste themselves throughout the genome. There are two primary groups of

75 retrotransposons, those having long-terminal repeats (LTRs) and those without (non-LTR)

76 (Cordaux and Batzer 2009). In the human genome, non-LTR retrotransposons consist of long  
77 interspersed elements (LINEs) and short interspersed elements (SINEs) and these collectively  
78 account for a remarkable ~33% of total genome sequence (Cordaux and Batzer 2009). *Alu*  
79 elements are primate-specific SINEs that are approximately 300 nucleotides in length and are  
80 abundant in the human genome, with over 1.3 million elements accounting for at least 11% of  
81 overall DNA sequence (Deininger et al. 2003; Hancks and Kazazian 2016). Although once  
82 considered to be useless ‘junk DNA’, the prevalence, diversity, and non-random distribution  
83 of *Alu* elements across primate genomes is suggestive of a functional advantage. Indeed, a  
84 large body of evidence documents that *Alu* elements have directly influenced primate  
85 evolution by facilitating genome innovation through: novel gene formation, elevated  
86 transcriptional diversity, long non-coding RNA and microRNA evolution (including circular  
87 RNAs), transcriptional regulation, and creation of novel response elements (Vansant and  
88 Reynolds 1995; Norris et al. 1995; Britten 1997; Lev-Maor et al. 2003; Polak and Domany  
89 2006; Laperriere et al. 2007; Lin et al. 2008, 2016; Lehnert et al. 2009; Cordaux and Batzer  
90 2009; Shen et al. 2011; Jeck et al. 2013; Töhönen et al. 2015; Luco 2016; Chen and Yang  
91 2017). Moreover, *Alus* fundamentally alter the three-dimensional architecture and spatial  
92 organization of primate genomes by defining the boundaries of chromatin interaction  
93 domains (i.e., topologically associating domains (TADs); Dixon et al. 2012). A growing body  
94 of evidence indicates that genome architecture has a direct influence on biological function,  
95 and the observation that *Alus* are enriched within both TADs and super-enhancer domains  
96 (SEDs) supports the hypothesis that *Alus* directly influence a wide range of critically  
97 important processes within primates across multiple levels, from overall genome stability to  
98 tissue-specific gene regulation (Huda et al. 2009; Dixon et al. 2012; Soibam 2017; Glinsky  
99 2018). In light of the functional benefits that *Alus* provide primates, it is interesting to note  
100 that *Alu* retrotransposition events occurred at an estimated 15-fold higher rate in the human,

101 chimpanzee, and bonobo lineage (as compared to other great apes) and a 2.2-fold higher rate  
102 in humans when compared to chimpanzee and bonobo (Hedges et al. 2004; Prüfer et al. 2012;  
103 Hormozdiari et al. 2013). These evolutionary patterns indicate that positive selection is acting  
104 to maintain *Alu* elements in primate genomes, especially within humans (Mattick and Mehler  
105 2008; Tsiganos and Rigoutsos 2009).

106         One of the most fascinating and biologically important aspects of *Alu* elements is that  
107 they serve an important role in the formation and function of the brain connectome (Oliver  
108 and Greene 2011; Li and Church 2013; Smalheiser 2014; Sakurai et al. 2014; Prendergast et  
109 al. 2014; Linker et al. 2017; Bitar and Barry 2018). Many lines of evidence connect *Alu*  
110 elements with neurogenesis and critical neuronal biochemical processes, including: somatic  
111 retrotransposition in developing neurons (in parallel to L1 retrotransposition; Baillie et al.  
112 2011; Kurnosov et al. 2015), formation of regulatory circRNAs that are enriched in the  
113 central nervous system (CNS) and concentrated at synapses (Jeck et al. 2013; Rybak-Wolf et  
114 al. 2015; Chen and Schuman 2016; Floris et al. 2017), regulation of genes that are essential  
115 for proper neuron function (e.g. *ACE*, *SMN1*, *SMN2*, *SLC6A4*; Wu et al. 2013; Ottesen et al.  
116 2017; Schneider et al. 2017), and elevated adenosine-to-inosine (A-to-I) RNA editing in the  
117 brain (Mehler and Mattick 2007; Kurnosov et al. 2015; Behm and Öhman 2016). In  
118 particular, epigenetic A-to-I editing plays a significant role in mediating neuronal gene  
119 expression pathways (Tariq and Jantsch 2012) with *Alus* serving as the primary target for  
120 RNA editing in primates (Picardi et al. 2015; Behm and Öhman 2016). Beyond RNA editing  
121 mechanisms, human neuronal gene pathways are regulated by noncoding RNAs originating  
122 from *Alu* elements (e.g., BC200 and NDM29) and specific *Alu* subfamilies contain retinoic  
123 acid response elements which help to regulate neural patterning, differentiation, and axon  
124 outgrowth (Vansant and Reynolds 1995; Laperriere et al. 2007; Maden 2007; Castelnovo et  
125 al. 2010; Smalheiser 2014). Moreover, recent discoveries indicate *Alu* elements underlie the

126 formation of a vast number of human-specific circRNAs that are hypothesized to play  
127 important roles in neurological gene expression pathways (Jeck et al. 2013; Rybak-Wolf et al.  
128 2015; Chen and Schuman 2016; Dong et al. 2017). There is a deep connection between *Alus*  
129 and the formation and function of primate neurological networks, and this has led to the  
130 hypothesis that *Alu* elements were essential for development of the transcriptional diversity  
131 and regulation required for the genesis of human cognitive function (Mattick and Mehler  
132 2008; Oliver and Greene 2011; Li and Church 2013; Sakurai et al. 2014).

133         Despite the functional benefits that *Alus* have provided primate genomes, *Alu*  
134 elements can disrupt gene expression and function through many pathways (Figure 1;  
135 Deininger and Batzer 1999; Deininger 2011; Tarallo et al. 2012; Ade et al. 2013; Elbarbary et  
136 al. 2016; Varizhuk et al. 2016). For this reason, the genome tightly regulates *Alus* using both  
137 DNA methylation and histone (H3K9 methylation) modification in order to control their  
138 expression and *de novo* retrotransposition (Varshney et al. 2015; Elbarbary et al. 2016; Mita  
139 and Boeke 2016) and there is mounting evidence indicating that the loss of these epigenetic  
140 control mechanisms (due to aging, cellular senescence, environmental factors and stress)  
141 contributes to many forms of cancer, diabetes, osteoporosis, and several mental and  
142 neurodegenerative disorders (Szpakowski et al. 2009; Belancio et al. 2010; Muotri et al.  
143 2010; Jintaridth et al. 2013; Dannlowski et al. 2014; Erwin et al. 2014; Bundo et al. 2014;  
144 Sun et al. 2014; Goodier 2016; Neven et al. 2016; Bedrosian et al. 2016; Shpyleva et al.  
145 2017; Thongsroy et al. 2017). With respect to deleterious *Alu* pathways and neurological  
146 disease, there are at least 37 mental and neurodegenerative disorders wherein *Alu* elements  
147 are hypothesized to disrupt key cellular processes, thereby resulting in or contributing to the  
148 diseased state (Table 1).

149         Given the tight connection between *Alu* elements and the formation and function of  
150 the nervous system, it is likely that the dysregulation of *Alu* elements contributes to many

151 sporadic or idiopathic neurological disorders observed across the global human population  
152 (Larsen et al. 2017). Here, we highlight both the beneficial neurological aspects of *Alu*  
153 elements as well as their potential to cause neurological disease. We focus on a novel  
154 hypothesis that identifies a potential epigenetic vulnerability to neurological networks that  
155 has likely escaped purifying selection. The *Alu* neurodegeneration hypothesis (sensu Larsen  
156 et al. 2017) posits that the epigenetic dysregulation of *Alu* elements ultimately serves to  
157 disrupt mitochondrial homeostasis in neurological networks, thereby setting the stage for  
158 increased neuronal stress and neurodegeneration. Given this hypothesis, it is noteworthy that  
159 many of the *Alu*-disrupted genes associated with neurological disorders are related to  
160 mitochondrial function and trafficking, including nuclear-encoded mitochondrial genes (i.e.,  
161 mitonuclear) which help to regulate oxidative stress and metabolic processes in the CNS  
162 (Table 1). Mitochondrial dysfunction is implicated across the spectrum of neurological and  
163 neurodegenerative disorders that are observed in humans and this pattern is suggestive of a  
164 genetic vulnerability that has evolved in humans. Considering this, we begin by reviewing the  
165 integral role that *Alu* elements have played in human evolution through brain-specific  
166 epigenetic A-to-I RNA editing pathways and neurological network formation. Although these  
167 *Alu*-related processes are hypothesized to have contributed to the origin of human cognition,  
168 they are likely accompanied by age or stress-related epigenetic vulnerabilities to the CNS,  
169 with mitochondrial pathways being especially sensitive.

170

### 171 ***Alu* elements, A-to-I editing, and evolution of the human brain**

172 *Alu* elements are non-randomly distributed throughout the genome. They occur most  
173 frequently within introns and are enriched within genes involved in metabolic, mitochondrial,  
174 cellular transport, and binding pathways (Grover et al. 2003; de Andrade et al. 2011; Larsen  
175 et al. 2017). *Alu* nucleotide sequences and lengths (~300 bp) are generally conserved (Batzer

176 and Deininger 2002) and it is this seemingly simple aspect of *Alu* biology that is of  
177 monumental biological importance. When inserted within a gene at opposite orientations and  
178 at close proximity, *Alus* bind upon themselves post-transcriptionally, resulting in the  
179 formation of a duplex stem-loop structure that is stabilized by the *Alu* nucleotide sequence  
180 and length (Figure 2; Athanasiadis et al. 2004). These *Alu*-based secondary structures  
181 fundamentally alter the shape of pre-mRNA molecules and serve as the primary binding site  
182 for ADAR proteins, which bind to the double-stranded pre-mRNA duplex and edit adenosine  
183 (A) residues to inosine (I) thereby recoding pre-mRNAs (Figure 2). When operating in  
184 coding regions (either directly or indirectly), the translation machinery interprets the resulting  
185 I residues as guanosine (G) and this mechanism accounts, in part, for the incredible diversity  
186 observed in the human proteome that is not encoded within the original DNA sequence  
187 (Nishikura 2016). However, the vast majority of A-to-I editing operating on *Alu* elements  
188 occurs within pre-mRNA introns and 3' UTRs and this can directly influence gene regulation  
189 and function in a surprising number of ways, including: the creation of novel splice donor  
190 and acceptor sites that result in *Alu* exonization and alternative gene splicing (Nishikura  
191 2016); recoding of exons immediately adjacent to *Alus* (Daniel et al. 2014); disruption of  
192 RNAi pathways (Chen and Carmichael 2008); production of novel micro-RNA regulatory  
193 sites (Borchert et al. 2009); and increased nuclear retention of promiscuously edited mRNAs  
194 (Chen and Carmichael 2008).

195         Although A-to-I editing plays an essential role in generating transcriptional diversity  
196 across eukaryotes, *Alu* elements provide primate-specific RNA editing opportunities. An  
197 example of this is found when comparing the rodent-specific SINE B1 family to *Alu*. Both  
198 B1 and *Alu* SINE families originated from 7SL RNA (Ullu and Tschudi 1984; Vassetzky et  
199 al. 2003) yet rodent-specific B1 elements are approximately half the length (~140 bp) of  
200 primate *Alus* (~300 bp) and have greater levels of intra-nucleotide variation. When



201 considering the functional mechanics of A-to-I editing (Figure 2), the shorter lengths and  
202 more variable rodent B1 elements result in the formation of shorter and less-stable double-  
203 stranded stem-loop structures in rodent pre-mRNAs. Thus, the molecular properties that  
204 separate rodent B1 from primate *Alu* translate to key functional genomic differences that have  
205 influenced evolutionary processes within each lineage (Eisenberg et al. 2005; Neeman et al.  
206 2006; Picardi et al. 2015; Tan et al. 2017).

207 A-to-I editing associated with *Alu* elements is perhaps one of the most functionally  
208 important yet underappreciated aspect of *Alu* biology. Approximately 90% of A-to-I editing  
209 within primate gene networks centers on *Alu* elements and this has fundamentally shaped  
210 primate evolution, including the evolution of our own species where A-to-I editing is  
211 estimated to occur at over 100 million sites in the human transcriptome (Bazak et al. 2014).  
212 Moreover, recent data supports a connection between A-to-I editing and neurological  
213 network formation, with elevated editing levels occurring throughout neurogenesis (Behm  
214 and Öhman 2016). Genes encoding for key neurological proteins involved in  
215 neurotransmission, neurogenesis, gliogenesis, and synaptogenesis are subject to enhanced A-  
216 to-I editing and thus a number of studies have hypothesized a strong link between A-to-I  
217 RNA editing pathways and brain development and function (Schmauss and Howe 2002;  
218 Mehler and Mattick 2007; Tan et al. 2009; Sakurai et al. 2014; Liscovitch et al. 2014; Behm  
219 and Öhman 2016; Hwang et al. 2016; Picardi et al. 2017b). A recent analysis of A-to-I  
220 editing in over 8,500 human samples identified tissue specific editing patterns with elevated  
221 editing levels in the brain, including unique patterns in the cerebellum (Tan et al. 2017). The  
222 vast majority of these neurologic A-to-I editing events are operating on *Alu* elements and,  
223 when combined with human-specific *Alu* evolution (Hedges et al. 2004; Cordaux and Batzer  
224 2009; Prüfer et al. 2012; Hormozdiari et al. 2013), this observation serves as the foundation

225 for the hypothesis that *Alu* elements and *Alu*-related pathways contributed to the evolution of  
226 enhanced human cognitive abilities (Mattick and Mehler 2008; Li and Church 2013).

227         Given the relationship between *Alu*-centric A-to-I editing and the formation and  
228 function of the CNS, it is important to expand upon the neuro-specific functions of ADAR  
229 proteins. Three ADAR proteins are identified (ADAR1, ADAR2, and ADAR3) and these  
230 proteins have distinct tissue-specific expression patterns (Picardi et al. 2015; Tan et al. 2017).  
231 ADAR1 and ADAR2 co-opt to regulate neuronal activity by editing key neurotransmitter  
232 receptors and ion channels in the CNS (Hood and Emeson 2011). Interestingly, both ADAR2  
233 and ADAR3 have unique brain-specific expression patterns with ADAR2 being highly  
234 expressed in the brain and ADAR3 exclusively expressed in the brain (Mehler and Mattick  
235 2007). Until recently the functional role of the brain-specific ADAR3 protein was largely  
236 unknown, however, Oakes et al. (2017) discovered that ADAR3 competes with ADAR2 to  
237 regulate glutamate receptor subunit B (*GRIA2*) A-to-I editing. The *GRIA2* protein forms a  
238 critical subunit of  $\alpha$ -amino-3-hydroxy-5methyl-4-isoxazole propionate (AMPA) receptors,  
239 which regulate synaptic calcium and are involved with synaptic plasticity, memory, and  
240 learning (Wright and Vissel 2012). Remarkably, A-to-I editing of a specific adenosine  
241 nucleotide within *GRIA2* results in an amino acid change that alters the GluR-2 protein  
242 conformation, thus disrupting calcium permeability of the AMPA receptor and potentially  
243 contributing to epilepsy, amyotrophic lateral sclerosis (ALS), and schizophrenia (see Oakes  
244 et al. 2017). In light of Oakes et al. (2017), the brain-specific expression pattern of ADAR3  
245 indicates that this protein helps to offset A-to-I editing by ADAR2, perhaps serving to  
246 mediate enhanced RNA editing processes throughout the CNS.

247         Considering the essential role that A-to-I editing processes play in the CNS, the  
248 dysregulation of these processes can have a profound impact on the stability of neurological  
249 networks (Mehler and Mattick 2007; Rice et al. 2012; Hwang et al. 2016). With respect to

250 ADAR proteins, mutations within ADAR1 have been linked to Aicardi-Goutières syndrome  
251 (characterized by severe brain dysfunction; Rice et al. 2012) and *Alu*-related alternative  
252 splicing events of ADAR2 are linked to glioma (Li et al. 2015). Disruption of ADAR1  
253 editing increases production of unedited RNAs which interact with MAV proteins in the  
254 outer mitochondrial membrane, ultimately serving to activate inflammatory response  
255 pathways (Bajad et al. 2017; Gallo et al. 2017) and perhaps providing a mechanism for  
256 inflammatory diseases of the CNS (Hofer and Campbell 2016). ADAR2 knockout mice  
257 display epileptic seizures and neuronal death caused by an influx of calcium owing to the  
258 disruption of *GRIA2* editing (see above). The interference of A-to-I editing processes  
259 associated with the *KCNA1* gene (encoding a protein essential for potassium regulation and  
260 neuron excitability) is hypothesized to underlie Episodic Ataxia Type-1 disorder, a disease of  
261 the CNS characterized by seizures, stress-induced ataxia, and myokymia (Ferrick-Kiddie et  
262 al. 2017). Moreover, a reduction of A-to-I editing has been observed within hippocampal  
263 tissues of Alzheimer's brains versus healthy controls (Khermesh et al. 2016). From a broader  
264 perspective, the disruption of A-to-I editing processes across the CNS has been linked to a  
265 wide variety of mental and neurodegenerative disorders including major depression and  
266 suicide, epilepsy, schizophrenia, Alzheimer's disease (AD), and ALS (Gurevich et al. 2002;  
267 Kawahara et al. 2004; Kwak and Kawahara 2005; Maas et al. 2006; Kubota-Sakashita et al.  
268 2014; Khermesh et al. 2016; Weissmann et al. 2016; Gal-Mark et al. 2017).

269

## 270 ***Alu* elements, neurogenesis, and the human brain connectome**

271 There is a strong connection between *Alu* A-to-I editing and the development and  
272 function of the brain, therefore it is impossible to disentangle *Alus* from the formation and  
273 function of neurologic networks (Mehler and Mattick 2007; Tan et al. 2009; Behm and  
274 Öhman 2016). It is estimated that the human brain is comprised of over 100 billion neurons

275 that are organized into functional hubs or parcels collectively forming the brain connectome  
276 (Van Den Heuvel and Sporns 2013). Beyond major structures of the brain (e.g., cerebellum,  
277 frontal cortex, hippocampus, etc.), the existence of connectome parcels shared across  
278 unrelated individuals is indicative of an evolutionary conserved process underlying  
279 neurological network formation and operating throughout neurogenesis. For example, a  
280 recent study mapped the cerebral cortex using multi-modal magnetic resonance imaging and  
281 identified 180 connectome parcels that were largely shared across 210 healthy adults (Glasser  
282 et al. 2016). Understanding the molecular processes that contribute to the formation of the  
283 human brain connectome is essential for understanding the origin of human-specific  
284 neurological disorders and diseases observed across the global distribution of our species.  
285 This is especially true for neurodegenerative conditions that are hypothesized to originate in  
286 functional network hubs and progress along neuronal network connections (e.g., AD; Seeley  
287 2017; Cope et al. 2018).

288 A growing body of evidence indicates that retrotransposons (including both LINEs  
289 and SINEs) are active throughout neurogenesis and contribute to mosaic neuron genomes that  
290 ultimately form the human brain connectome (Muotri et al. 2005; Erwin et al. 2014;  
291 Kurnosov et al. 2015; Evrony 2016; Paquola et al. 2016; Linker et al. 2017). Although  
292 somatic L1 retrotransposition events within developing neurons have received much  
293 attention, it is noteworthy that *Alu* retrotransposition occurs in parallel with L1 throughout  
294 neurogenesis (Baillie et al. 2011; Kurnosov et al. 2015), thus providing primate-specific  
295 aspects of neurologic network formation. Furthermore, there is evidence that unites *Alu*  
296 elements with retinoic acid regulation (Vansant and Reynolds 1995; Laperriere et al. 2007),  
297 which is essential for neuronal patterning and differentiation throughout neurogenesis and is  
298 a potential regulator of neuron regeneration (Maden 2007). Retinoic acid is vital for the  
299 establishment, maintenance, and repair of neuronal networks and, given the presence of

300 retinoic acid response elements in *Alu* elements, it is possible that *Alu* activity during  
301 neurogenesis is connected to retinoic acid signaling processes.

302         Considering the *Alu* regulatory pathways discussed above, it is of great interest to  
303 note that retrotransposition of *Alu* elements is hypothesized to occur at elevated levels within  
304 the dentate gyrus of the hippocampus, the putative site of adult neurogenesis (Kurnosov et al.  
305 2015). Moreover, A-to-I editing levels steadily increase as neural progenitor cells develop  
306 into adult neurons (Behm and Öhman 2016). These data indicate that at least two  
307 retrotransposon-centric processes (somatic retrotransposition of both LINES and SINES and  
308 enhanced A-to-I editing operating primarily on *Alu* elements) are major contributors to  
309 neurogenesis, perhaps serving to establish the neuronal and biochemical diversity that  
310 underlies the ~100 billion neuron brain connectome. Remarkably, emerging data suggests  
311 that a third *Alu*-centric process is associated with the formation and function of neurological  
312 networks, this being the production of circRNAs that are enriched in the brain and  
313 concentrated at synaptic junctions (Jeck et al. 2013; Rybak-Wolf et al. 2015; Chen and  
314 Schuman 2016). Identifying vulnerabilities to each of these retrotransposon-centric processes  
315 will likely contribute to the identification of novel mechanisms underlying mental disorders  
316 and neurologic disease and could lead to novel therapeutic interventions.

317

### 318 **Pathways to incipient neuronal stress and neurological disease**

319         The disruption of *Alu*-centric epigenetic RNA editing processes is implicated across  
320 the entire spectrum of neurologic disorders (see above). In light of this observation, it is  
321 interesting to note that another, seemingly unrelated, feature of many neurological disorders  
322 is mitochondrial dysfunction (Lin and Beal 2006; Rugarli and Langer 2012; Gottschalk et al.  
323 2014; Petschner et al. 2017). However, we have previously shown that mitonuclear genes are  
324 enriched with *Alu* elements when compared to random (Larsen et al. 2017), which is

325 consistent with earlier observations regarding the non-random insertion of *Alu* elements into  
326 genes associated with transcriptionally active regions of the genome (Grover et al. 2003; de  
327 Andrade et al. 2011). Thus, it is likely that *Alu*-mediated gene regulatory processes are  
328 actively influencing mitonuclear gene expression, regulation, and protein function through  
329 the pathways discussed above and reviewed in Chen and Yang (2017). Knowing this, the  
330 dysregulation of epigenetic *Alu* regulatory pathways is a plausible source for mitochondrial  
331 stress and dysfunction, with the CNS being particularly vulnerable (Larsen et al. 2017). Such  
332 a mechanism could contribute to the initial activation of complex mitochondrial stress  
333 pathways and incipient neuronal stress associated with sporadic neurologic disorders (e.g.,  
334 inflammation, immune response, mitophagy, etc.). Importantly, these processes would  
335 precede macroscopic pathologies such as protein aggregation and neuronal atrophy observed  
336 in neurodegenerative diseases (Swerdlow et al. 2010; Larsen et al. 2017; Swerdlow 2017).

337         The *Alu* neurodegeneration hypothesis (*sensu* Larsen et al. 2017) proposes a ‘double-  
338 edged sword’, whereby the beneficial *Alu*-related processes that underlie neuron diversity and  
339 function also have the potential to disrupt mitochondrial homeostasis across neurological  
340 networks through deleterious cascade events that are facilitated by eroding tissue-specific *Alu*  
341 epigenetic control mechanisms. The stability of the brain’s connectome and the entire CNS  
342 depends on healthy mitochondrial populations within neurons, astrocytes, microglia and  
343 supporting cells (Cai et al. 2011; Viader et al. 2011; Schwarz 2013; Jackson and Robinson  
344 2017). Mitochondria play critical roles for a wide range of essential neuronal processes  
345 including glucose and lipid metabolism, metal ion biosynthesis, cellular trafficking along  
346 axons, neurotransmitter relay across synapses, and synaptic calcium homeostasis (Schwarz  
347 2013; Harbauer et al. 2014). Therefore, molecular mechanisms that are known to disrupt gene  
348 expression and protein folding of genes that are essential for mitochondrial function can  
349 ultimately disrupt neurological function.

350 Interference of mitochondrial dynamics across the CNS is consistently hypothesized  
351 to occur during the earliest stages of mental, neurological, and neurodegenerative disorders  
352 ranging from depression, epilepsy, and schizophrenia to ALS, AD, and Parkinson's disease  
353 (PD; Lu 2009; Rezin et al. 2009; Kim et al. 2010; Coskun et al. 2012; Martin 2012;  
354 Gottschalk et al. 2014; Larsen et al. 2017; Flippo and Strack 2017; Petschner et al. 2017).  
355 Collectively, these disorders are estimated to impact approximately 250 million people  
356 globally, accounting for at least 10.2% of the global disease burden (GBD 2015 Neurologic  
357 Disorders Collaborator Group 2017). The occurrence of sporadic forms of human-specific  
358 neurologic disorders (e.g. non-familial schizophrenia, ALS, late-onset AD, PD, etc.) across  
359 the entire distribution of our species is suggestive of a common yet complex genetic  
360 mechanism that evolved in primates and is amplified in humans (Larsen et al. 2017).  
361 Considering this, we expand on the mitocentric view of idiopathic neurologic disease  
362 manifestation by reviewing the evidence that unites primate-specific *Alu* activity with  
363 incipient neurologic mitochondrial dysfunction.

364 Eukaryotic mitochondria are hypothesized to have originated from an endosymbiotic  
365 alphaproteobacterium which, over expansive evolutionary time, evolved in parallel with host  
366 genomes into the mitochondrial organelles that we observe today (Roger et al. 2017). The  
367 human mitochondrial genome encodes only 13 proteins yet it is estimated that human  
368 mitochondria depend on approximately ~2,000 genes encoded within the nuclear genome for  
369 their functionality (Calvo et al. 2015; Johnson et al. 2017). These mitonuclear genes are thus  
370 subject to deleterious *Alu* activity and *Alu*-related deleterious events have been linked to  
371 many neurologic and neurodegenerative disorders, including epilepsy, Wilson's disease,  
372 Leigh syndrome, PD, ALS, and AD (Table 1 and references therein; Figure 3). When  
373 considering the incipient mitochondrial dysfunction observed across the spectrum of  
374 neurological neurodegenerative disorders, it is possible that tissue-specific epigenetic

375 dysregulation of *Alu* elements within the CNS can ultimately manifest into distinct disease  
376 phenotypes (Larsen et al. 2017).

377         Several interesting patterns emerge when examining the key neurologic processes that  
378 are disrupted through deleterious *Alu* activity (Table 1). For example, mitochondria play an  
379 essential role in maintaining intra-cellular metal ion homeostasis (e.g., iron, copper, and  
380 zinc), the disruption of which can result in the increased production of free radicals that  
381 damage mitochondria and contribute to the increased production of reduced oxygen species  
382 (ROS; Rossi et al. 2004; Madsen and Gitlin 2007). The brain is especially sensitive to ROS  
383 production, and iron, copper, and zinc-related oxidative stress has been linked to many  
384 neurodegenerative disorders including AD, PD, and Wilson's disease (Rossi et al. 2004;  
385 Madsen and Gitlin 2007). It is notable that deleterious *Alu* activity has been identified in  
386 several genes that are essential to maintaining proper iron and copper homeostasis, including  
387 *FXN*, *ATP7A*, *ATP7B*, *HMBS*, *NDUFS2*, *SLC30A6*, and *PARK7 (DJ-1)* (Table 1; Gu et al.  
388 2007; Kaler 2011; Girotto et al. 2014). Knowing this, it is possible that either global or tissue-  
389 specific dysregulation of *Alu* elements within mitonuclear genes can alter mitochondrial  
390 metal ion processing pathways thereby contributing to increased ROS production leading to  
391 neurologic stress.

392         A second interesting pattern with respect to deleterious neurologic *Alu* activity  
393 concerns metabolic pathways. The efficient processing of glucose and lipids across the CNS  
394 is critical for the stability and function of neurons, and the disruption of mitochondrial-  
395 mediated metabolic pathways has been linked to many neurologic disorders including AD  
396 and peripheral neuropathies (Viader et al. 2013; De La Monte and Tong 2014). Deleterious  
397 *Alu* activity occurs in genes that are critical for glucose and lipid metabolism, including  
398 *ABCD1*, *ACAT1*, *ALMS1*, *APOB*, *GK*, *GLA*, *HPRT*, *LPL*, *PDHA1*, *PMM2*, *PSEN1*, *SOD2* and  
399 *SPAST* (Table 1). Several of these genes encode for mitochondrial-related proteins that have



400 been implicated in metabolic diseases that directly, or indirectly, contribute to neurological  
401 dysfunction. The connection between *Alu* elements and metabolic pathways is consistent with  
402 the observation that *Alu* elements preferentially insert into metabolic genes, and this has led  
403 to the hypothesis that *Alus* regulate the expression of genes related to Type 1 Diabetes  
404 (Grover et al. 2003; Mirza et al. 2014; Kaur and Pociot 2015). Moreover, *Alu* RNAs act to  
405 suppress the expression of both endothelial nitric oxide synthase (eNOS) and superoxide  
406 dismutase 2 (SOD2) during hyperglycemic conditions (Wang et al. 2016), suggesting a  
407 regulatory role of *Alu* elements during oxidative stress and strengthening the link between  
408 *Alu* element activity and diabetes.

409         There is growing evidence linking sporadic AD with dysfunctional metabolic  
410 pathways, leading some to consider AD as a ‘Type 3 Diabetes’ wherein glycolysis and lipid  
411 homeostasis is altered (Steen et al. 2005; De La Monte et al. 2006; De La Monte and Wands  
412 2008; De La Monte and Tong 2014; De Felice and Lourenco 2015; Mittal et al. 2016). The  
413 most well-documented risk factor for AD is a variant within *APOE* (*APOE*  $\epsilon$ 4), a gene which  
414 encodes for a glycoprotein that mediates cholesterol and lipid transport (Saunders et al.  
415 1993; Strittmatter et al. 1993; Mahley and Rall 2000). The *APOE*  $\epsilon$ 4 allele is strongly  
416 associated with earlier onset of AD, and it is hypothesized that this is a result of the  
417 disruption of cholesterol processing and subsequent accumulation of amyloid precursor  
418 proteins (APP; i.e., the Amyloid cascade hypothesis). Although the ‘Amyloid cascade  
419 hypothesis’ has dominated Alzheimer’s research for decades (Hardy and Higgins 1992;  
420 Selkoe 2000; McKhann et al. 2011), the failure of multiple drug trials targeting amyloid  
421 pathways has led many in the Alzheimer’s research community to search for alternative  
422 hypotheses that can help explain the origin of neurodegenerative disease as well as novel  
423 molecular pathways with therapeutic potential (Herrup 2015).

424 It is of particular interest then to note that a second genetic risk factor for AD,  
425 *TOMM40*, is located immediately adjacent to *APOE* on human chromosome 19, and the two  
426 genes are in tight linkage disequilibrium (Lyall et al. 2014; Roses et al. 2016a). *TOMM40*  
427 encodes for a beta-barrel protein that ultimately forms a central pore in the outer  
428 mitochondrial membrane (Shiota et al. 2015) and, much like *APOE*, genetic variants of  
429 *TOMM40* are linked to cognitive impairment and neurodegenerative disease (Roses 2010;  
430 Gottschalk et al. 2014; Greenbaum et al. 2014; Roses et al. 2016b; Arpawong et al. 2017).  
431 The most-well known of these *TOMM40* variants is the rs10524523 (rs523) homopolymer  
432 repeat, a variable stretch of deoxythymidine (T) located within *TOMM40* intron 6 (Roses  
433 2010). The rs523 poly-T varies in length from approximately 12 to 46 nucleotides, and the  
434 longer variants are statistically associated with thinning of the hippocampus (independent of  
435 the *APOE*  $\epsilon$ 4 allele; Burggren et al. 2017) and earlier onset of AD (Lutz et al. 2010; Roses et  
436 al. 2010). Interestingly, rs523 is embedded within tandemly repeated *Alu* elements and  
437 originated from an *Alu* insertion event (Larsen et al. 2017). At least 149 *Alu* A-to-I editing  
438 events are identified within *TOMM40*, the majority of which are associated with *Alu* elements  
439 surrounding the rs523 repeat and intron 9 (Picardi et al. 2017a).

440 There is a potentially important link that unties *APOE* APP processing with the  
441 functional mechanics of pre-protein transport through the TOMM pore. It is possible that  
442 conformational changes of the Tom40 protein, potentially originating from *Alu*-mediated  
443 events (see above, reviewed in Elbarbary et al. 2016; Chen and Yang 2017; Larsen et al.  
444 2017), can ultimately serve to restrict the passage of lipids across the outer-mitochondrial  
445 membrane (Larsen et al. 2017). When combined with altered APP processing, this process  
446 could account for the initial site of intra-cellular protein accumulation that is hypothesized to  
447 precede extra-cellular plaque formation during very early stages of AD (Skovronsky et al.  
448 1998; D'Andrea et al. 2001; Takahashi et al. 2002). Consistent with this hypothesis is the

449 direct observation of APP accumulation at the TOMM pore (Devi et al. 2006) as well as  
450 functional tolerance of Tom40 conformational changes by mitochondria (Mager et al. 2011;  
451 Kuszak et al. 2015). Importantly, this mechanism could help to explain the common patterns  
452 of protein accumulation (e.g., amyloid plaques and alpha-synuclein Lewy bodies) observed  
453 across the spectrum of neurodegenerative disease, including ALS, AD, and PD (Ross and  
454 Poirier 2004; Gottschalk et al. 2014; Larsen et al. 2017). An age or stress-related component  
455 to Tom40 conformational changes comes with the epigenetic dysregulation of *Alu* elements  
456 associated with the aging process or traumatic stress (see Larsen et al. 2017). Whether or not  
457 these processes are directly mediated by deleterious *Alu* events remains to be tested, however,  
458 it is notable that *Alu* exons and *Alu* somatic retrotransposition events have been identified in  
459 several TOM genes that are required for the stability of the translocase of the outer  
460 mitochondrial membrane and pre-protein import, including *TOMM5*, *TOMM7*, *TOMM22*,  
461 *TOMM40*, and *TOMM40L* (Baillie et al. 2011; de Andrade et al. 2011; Lin et al. 2016).

462         With respect to *Alu* elements, mitochondrial dysfunction, and the broader pathological  
463 scope of AD and other neurodegenerative diseases, there is evidence suggesting that *Alu*-  
464 derived peptides interact with tau proteins, perhaps serving a regulatory role for tau  
465 phosphorylation (Hoenicka et al. 2002). Tau is a microtubule associated protein that  
466 functions to stabilize axonal microtubules and to transport mitochondria along axons, and  
467 taupathies (including tau hyperphosphorylation) are a characteristic feature of several  
468 neurodegenerative diseases including AD, progressive supranuclear palsy, corticobasal  
469 degeneration, and Pick's disease (Ittner and Götz 2011; Khanna et al. 2016). The *MAPT* gene  
470 encodes for tau and alternative splicing events of *MAPT* result in multiple tau isoforms  
471 (Reddy 2011). Approximately 86 *Alu* elements (including FLAMs) are distributed throughout  
472 *MAPT* introns and A-to-I editing is occurring at 315 *Alu* related sites with elevated levels at  
473 the 3' end of *MAPT* (REDIportal database; Picardi et al. 2017a). When considering the

474 potential for *Alu* structural variants of *MAPT* (including DNA and pre-mRNA secondary  
475 structures) and evidence of *Alu* RNAs interacting with tau proteins (Hoenicka et al. 2002), we  
476 recommend additional studies aimed at elucidating the regulatory impacts that *Alu* elements  
477 might have on *MAPT* gene expression and tau phosphorylation.

478

#### 479 **A-to-I editing and the potential for mitochondrial stress**

480         Although several neurological disorders are hypothesized to be the result of disruptive  
481 A-to-I editing processes across the CNS (see above), it is presently unknown whether or not  
482 these processes are actively influencing mitochondrial function. What evidence is there  
483 indicating that post-transcriptional modification of mitonuclear genes can alter gene  
484 expression or function? Are there particular neurological or neurodegenerative disorders that  
485 are associated with mitonuclear genes that have elevated levels of A-to-I editing? To provide  
486 insights into these questions, we searched the REDportal A-to-I editing database (Picardi et  
487 al. 2017a) for mitonuclear genes where 1) A-to-I editing has been identified within *Alu*  
488 elements in coding regions and 2) A-to-I editing has contributed to non-synonymous amino  
489 acid changes. We identified 57 mitonuclear genes with A-to-I editing occurring within  
490 putative *Alu* exons and in 52 of these genes the post-transcriptional modification resulted in  
491 nonsynonymous amino acid changes (Supplementary Table 1). Many of these genes are  
492 involved with essential neuronal processes including calcium binding and transport, zinc  
493 transport, apoptosis regulation, voltage-gated ion channels, and mitochondrial elongation  
494 with notable examples including *ADSL*, *BAX*, *CASP2*, *COQ2*, *DFFB*, *FBXO18*, *LYRM4*,  
495 *PACRG*, and *SLC30A6* (Supplementary Table 1).

496         From a broader perspective, we identified enhanced A-to-I editing across 134  
497 mitonuclear genes that are associated with a spectrum of neurologic and neurodegenerative  
498 disorders ranging from depression, tobacco use disorder, and bipolar disorder to ALS, Leigh

499 syndrome, PD, and AD (Supplementary Table 2). In light of these patterns, we hypothesize  
500 that system-wide or tissue-specific epigenetic dysregulation of *Alu* A-to-I editing within the  
501 CNS can serve to disrupt key mitochondrial biochemical processes, thus potentially  
502 contributing to incipient mitochondrial and neuronal stress (Figure 3).

503

## 504 **Conclusions**

505       Enhanced somatic retrotransposon throughout neurogenesis contributes to the mosaic  
506 brain, however, such activity likely contributes to mosaic pathways leading to disease (Erwin  
507 et al. 2014). Elucidating these pathways might ultimately provide insight into the sporadic  
508 nature of idiopathic diseases that are impacting the global human population. The disruption  
509 of *Alu*-mediated pathways that underlie gene regulation is a plausible mechanism for the  
510 origin of complex human-specific neurologic and neurodegenerative disorders. Although  
511 many of these disorders have similar phenotypes (e.g., mitochondrial dysfunction), it is  
512 possible that these phenotypes arise from deleterious activity operating across tissue-specific  
513 gene networks. If correlated with eroding or fluctuating epigenetic control mechanisms of  
514 retrotransposons that are associated with aging, cellular senescence, and/or cellular stress  
515 (Belancio et al. 2010; Pal and Tyler 2016; Schneider et al. 2017), then such mechanisms  
516 might largely escape purifying selection and would be difficult to detect using traditional  
517 methods (e.g., genome-wide association studies). It is important to note that the *Alu*-centric  
518 mechanisms discussed herein collectively provide a unified framework for multiple  
519 hypotheses that have been put forth regarding the origin of neurodegenerative disease  
520 including inflammation, oxidative-stress, metabolic dysfunction, and accumulation of protein  
521 bodies (see above).

522       *Alu* elements have played a pivotal role in the evolution of the human epigenome  
523 (Prendergast et al. 2014), and both hyper- and hypomethylation of *Alu* elements have been

524 correlated with a number of age-related disorders including Alzheimer’s disease, multiple  
525 sclerosis, osteoporosis, and many forms of cancer (Bollati et al. 2009; Jintaridth and  
526 Mutirangura 2010; Belancio et al. 2010; Jintaridth et al. 2013; Neven et al. 2016). In light of  
527 these patterns, as well as the newly discovered regulatory roles of *Alu* elements (Polak and  
528 Domany 2006; Chen and Carmichael 2008; Chen and Yang 2017), we recommend additional  
529 research that focuses on the epigenetic interplay between *Alu* elements and mitochondrial  
530 gene networks in the central nervous system.

531

532

533

#### 534 **Acknowledgments**

535 We thank A.D. Brown, W.K. Gottschalk, and M. Mihovilovic for helpful discussion. C.  
536 Hohoff, B. Ciapa, and an anonymous reviewer kindly reviewed the manuscript and provided  
537 helpful comments. This is Duke Lemur Center publication number 1389.

538

#### 539 **References**

- 540 Ade C, Roy-Engel AM, Deininger PL (2013) *Alu* elements: An intrinsic source of human  
541 genome instability. *Curr. Opin. Virol.* 3:639–645.
- 542 Antonell A, Gelpi E, Sánchez-Valle R, et al (2012) Breakpoint sequence analysis of an A $\beta$ PP  
543 locus duplication associated with autosomal dominant Alzheimer’s disease and severe  
544 cerebral amyloid angiopathy. *J Alzheimers Dis* 28:303–3088
- 545 Arnoldi A, Tonelli A, Crippa F, et al (2008) A clinical, genetic, and biochemical  
546 characterization of SPG7 mutations in a large cohort of patients with hereditary spastic  
547 paraplegia. *Hum Mutat* 29:522–531.
- 548 Arpawong TE, Pendleton N, Mekli K, et al (2017) Genetic variants specific to aging-related  
549 verbal memory: Insights from GWASs in a population-based cohort. *PLoS One*  
550 12:e0182448.
- 551 Athanasiadis A, Rich A, Maas S (2004) Widespread A-to-I RNA editing of *Alu*-containing  
552 mRNAs in the human transcriptome. *PLoS Biol* 2:e391.
- 553 Baillie JK, Barnett MW, Upton KR, et al (2011) Somatic retrotransposition alters the genetic  
554 landscape of the human brain. *Nature* 479:534–537.
- 555 Bajad P, Jantsch MF, Keegan L, O’Connell M (2017) A to I editing in disease is not fake  
556 news. *RNA Biol* 14:1223–1231.
- 557 Batzer MA, Deininger PL (2002) *Alu* repeats and human genomic diversity. *Nat Rev Genet*

- 558 3:370–379.
- 559 Bazak L, Haviv A, Barak M, et al (2014) A-to-I RNA editing occurs at over a hundred  
560 million genomic sites, located in a majority of human genes. *Genome Res* 24:365–376.
- 561 Bedrosian TA, Linker S, Gage FH (2016) Environment-driven somatic mosaicism in brain  
562 disorders. *Genome Med* 8:58.
- 563 Behm M, Öhman M (2016) RNA Editing: A Contributor to Neuronal Dynamics in the  
564 Mammalian Brain. *Trends Genet* 32:165–175.
- 565 Belancio VP, Roy-Engel AM, Deininger PL (2010) All y'all need to know 'bout  
566 retroelements in cancer. *Semin Cancer Biol* 20:200–210.
- 567 Bhattacharjee A, Yang H, Duffy M, et al (2016) The Activity of Menkes Disease Protein  
568 ATP7A Is Essential for Redox Balance in Mitochondria. *J Biol Chem* 291:16644–  
569 16658.
- 570 Bitar M and Barry G (2017) Multiple innovations in genetic and epigenetic mechanisms  
571 cooperate to underpin human brain evolution. *Mol Biol Evol*, msx303, doi:  
572 10.1093/molbev/msx303
- 573 Bollati V, Schwartz J, Wright R, et al (2009) Decline in genomic DNA methylation through  
574 aging in a cohort of elderly subjects. *Mech Ageing Dev* 130:234–239.
- 575 Bondurand N, Fouquet V, Baral V, et al (2012) Alu-mediated deletion of SOX10 regulatory  
576 elements in Waardenburg syndrome type 4. *Eur J Hum Genet* 20:990–994. doi:  
577 10.1038/ejhg.2012.29
- 578 Bondy-Chorney E, Crawford Parks TE, Ravel-Chapuis A, et al (2016) Stauf1 Regulates  
579 Multiple Alternative Splicing Events either Positively or Negatively in DM1 Indicating  
580 Its Role as a Disease Modifier. *PLoS Genet* 12:e1005827. doi:  
581 10.1371/journal.pgen.1005827
- 582 Bonifati V, Rizzu P, van Baren MJ, et al (2003) Mutations in the DJ-1 gene associated with  
583 autosomal recessive early-onset parkinsonism. *Science* 299:256–9. doi:  
584 10.1126/science.1077209
- 585 Boone PM, Yuan B, Campbell IM, et al (2014) The Alu-rich genomic architecture of SPAST  
586 predisposes to diverse and functionally distinct disease-associated CNV alleles. *Am J*  
587 *Hum Genet* 95:143–161.
- 588 Borchert GM, Gilmore BL, Spengler RM, et al (2009) Adenosine deamination in human  
589 transcripts generates novel microRNA binding sites. *Hum Mol Genet* 18:4801–7. doi:  
590 10.1093/hmg/ddp443
- 591 Bouchet C, Vuillaumier-Barrot S, Gonzales M, et al (2007) Detection of an Alu insertion in  
592 the POMT1 gene from three French Walker Warburg syndrome families. *Mol Genet*  
593 *Metab* 90:93–96. doi: 10.1016/j.ymgme.2006.09.005
- 594 Britten RJ (1997) Mobile elements inserted in the distant past have taken on important  
595 functions. *Gene* 205:177–82.
- 596 Brooks EM, Branda RF, Nicklas JA, O'Neill JP (2001) Molecular description of three macro-  
597 deletions and an Alu-Alu recombination-mediated duplication in the HPRT gene in four  
598 patients with Lesch-Nyhan disease. *Mutat Res* 476:43–54.
- 599 Bundo M, Toyoshima M, Okada Y, et al (2014) Increased I1 retrotransposition in the  
600 neuronal genome in schizophrenia. *Neuron* 81:306–13. doi:  
601 10.1016/j.neuron.2013.10.053
- 602 Burggren AC, Mahmood Z, Harrison TM, et al (2017) Hippocampal thinning linked to longer  
603 TOMM40 poly-T variant lengths in the absence of the APOE ε4 variant. *Alzheimer's*  
604 *Dement* 13:739–748. doi: 10.1016/j.jalz.2016.12.009
- 605 Cai Q, Davis ML, Sheng Z-H (2011) Regulation of axonal mitochondrial transport and its  
606 impact on synaptic transmission. *Neurosci Res* 70:9–15. doi:  
607 10.1016/j.neures.2011.02.005

- 608 Calvo SE, Clauser KR, Mootha VK (2015) MitoCarta2.0: An updated inventory of  
609 mammalian mitochondrial proteins. *Nucleic Acids Res* 44:D1251–D1257. doi:  
610 10.1093/nar/gkv1003
- 611 Castelnuovo M, Massone S, Tasso R, et al (2010) An Alu-like RNA promotes cell  
612 differentiation and reduces malignancy of human neuroblastoma cells. *FASEB J*  
613 24:4033–4046. doi: 10.1096/fj.10-157032
- 614 Checler F, Goiran T, da Costa AC (2017) Presenilins at the crossroad of a functional  
615 interplay between PARK/PARKIN and PINK1 to control mitophagy: implications for  
616 neurodegenerative diseases. *Autophagy* 15:1–2. doi: 10.1080/15548627.2017.1363950
- 617 Chen L-L, Carmichael GG (2008) Gene regulation by SINES and inosines: biological  
618 consequences of A-to-I editing of Alu element inverted repeats. *Cell Cycle* 7:3294–  
619 3301. doi: 10.4161/cc.7.21.6927
- 620 Chen L-L, Yang L (2017) ALUalternative Regulation for Gene Expression. *Trends Cell Biol*  
621 27:480–490. doi: 10.1016/j.tcb.2017.01.002
- 622 Chen W, Schuman E (2016) Circular RNAs in Brain and Other Tissues: A Functional  
623 Enigma. *Trends Neurosci* 39:597–604. doi: 10.1016/j.tins.2016.06.006
- 624 Choi B-O, Kim NK, Park SW, et al (2011) Inheritance of Charcot–Marie–Tooth disease 1A  
625 with rare nonrecurrent genomic rearrangement. *Neurogenetics* 12:51–58. doi:  
626 10.1007/s10048-010-0272-3
- 627 Conceição Pereira M, Loureiro JL, Pinto-Basto J, et al (2012) Alu elements mediate large  
628 SPG11 gene rearrangements: further spatacsin mutations. *Genet Med* 14:143–151. doi:  
629 10.1038/gim.2011.7
- 630 Chong-Chong X, Denton KR, Wang Z, et al (2016) Abnormal mitochondrial transport and  
631 morphology as early pathological changes in human models of spinal muscular atrophy.  
632 *Dis Model Mech* 9:39–49.
- 633 Cope TE, Rittman T, Borchert RJ, et al. (2018) Tau burden and the functional connectome in  
634 Alzheimer’s disease and progressive supranuclear palsy. *Brain*, awx347,  
635 doi.org:10.1093/brain/awx347
- 636 Cordaux R, Batzer MA (2009) The impact of retrotransposons on human genome evolution.  
637 *Nat Rev Genet* 10:691–703. doi: 10.1038/nrg2640
- 638 Coskun P, Wyrembak J, Schriener SE, et al (2012) A mitochondrial etiology of Alzheimer and  
639 Parkinson disease. *Biochim Biophys Acta (BBA)-General Subj* 1820:553–564.
- 640 D’Andrea MR, Nagele RG, Wang HY, et al (2001) Evidence that neurones accumulating  
641 amyloid can undergo lysis to form amyloid plaques in Alzheimer’s disease.  
642 *Histopathology* 38:120–134. doi: 10.1046/j.1365-2559.2001.01082.x
- 643 Daniel C, Silberberg G, Behm M, Öhman M (2014) Alu elements shape the primate  
644 transcriptome by cis-regulation of RNA editing. *Genome Biol* 15:R28. doi: 10.1186/gb-  
645 2014-15-2-r28
- 646 Dannlowski U, Kugel H, Redlich R, et al (2014) Serotonin transporter gene methylation is  
647 associated with hippocampal gray matter volume. *Hum Brain Mapp* 35:5356–5367. doi:  
648 10.1002/hbm.22555
- 649 Dawson G, Kilkus J, Siakotos AN, et al (1995) Mitochondrial abnormalities in CLN2 and  
650 CLN3 forms batten disease. *Mol Chem Neuro* 29:227–235.
- 651 De Andrade A, Wang M, Bonaldo MF, et al (2011) Genetic and epigenetic variations  
652 contributed by Alu retrotransposition. *BMC Genomics* 12:617.
- 653 De Felice FG, Lourenco M V (2015) Brain metabolic stress and neuroinflammation at the  
654 basis of cognitive impairment in Alzheimer’s disease. *Front Aging Neurosci* 7:94. doi:  
655 10.3389/fnagi.2015.00094
- 656 De La Monte SM, Tong M (2014) Brain metabolic dysfunction at the core of Alzheimer’s  
657 disease. *Biochem. Pharmacol.* 88:548–559.



- 658 De La Monte SM, Tong M, Lester-Coll N, et al (2006) Therapeutic rescue of  
659 neurodegeneration in experimental type 3 diabetes: relevance to Alzheimer's disease. *J*  
660 *Alzheimers Dis* 10:89–109. doi: 10.2165/11597760-000000000-00000
- 661 De La Monte SM, Wands JR (2008) Alzheimer's Disease is Type 3 Diabetes—Evidence  
662 Reviewed. *J Diabetes Sci Technol* 2:1101–1113. doi: 10.1177/193229680800200619
- 663 Deininger P (2011) Alu elements: know the SINEs. *Genome Biol* 12:1.
- 664 Deininger PL, Batzer MA (1999) Alu repeats and human disease. *Mol Genet Metab* 67:183–  
665 193.
- 666 Deininger PL, Moran J V, Batzer MA, Kazazian HH (2003) Mobile elements and  
667 mammalian genome evolution. *Curr Opin Genet Dev* 13:651–658.
- 668 Devi L, Prabhu BM, Galati DF, et al (2006) Accumulation of amyloid precursor protein in  
669 the mitochondrial import channels of human Alzheimer's disease brain is associated  
670 with mitochondrial dysfunction. *J Neurosci* 26:9057–9068.
- 671 Dixon JR, Selvaraj S, Yue F, et al. (2012) Topological domains in mammalian genomes  
672 identified by analysis of chromatin interactions. *Nature* 485:376–380.
- 673 Dobrovolny R, Nazarenko I, Kim J, et al (2011) Detection of large gene rearrangements in X-  
674 linked genes by dosage analysis: identification of novel  $\alpha$ -galactosidase A (GLA)  
675 deletions causing Fabry disease. *Hum Mutat* 32:688–695. doi: 10.1002/humu.21474
- 676 Dong R, Ma XK, Chen LL, Yang L (2017) Increased complexity of circRNA expression  
677 during species evolution. *RNA Biol* 14:1064–1074.
- 678 Eisenberg E, Nemzer S, Kinar Y, et al (2005) Is abundant A-to-I RNA editing primate-  
679 specific? *Trends Genet* 21:77–81. doi: 10.1016/j.tig.2004.12.005
- 680 Elbarbary RA, Lucas BA, Maquat LE (2016) Retrotransposons as regulators of gene  
681 expression. *Science* 351:aac7247.
- 682 Erwin JA, Marchetto MC, Gage FH (2014) Mobile DNA elements in the generation of  
683 diversity and complexity in the brain. *Nat Rev Neurosci* 15:497–506.
- 684 Evrony GD (2016) One brain, many genomes. *Science* 354:557–558.
- 685 Ferrari L, Scuvera G, Tucci A, et al (2017) Identification of an atypical microdeletion  
686 generating the RNF135-SUZ12 chimeric gene and causing a position effect in an NF1  
687 patient with overgrowth. *Hum Genet* 136:1329–1339. doi: 10.1007/s00439-017-1832-5
- 688 Ferrick-Kiddie EA, Rosenthal JJC, Ayers GD, Emeson RB (2017) Mutations underlying  
689 Episodic Ataxia type-1 antagonize Kv1.1 RNA editing. *Sci Rep* 7:41095. doi:  
690 10.1038/srep41095
- 691 Flippo KH, Strack S (2017) An emerging role for mitochondrial dynamics in schizophrenia.  
692 *Schizophr. Res.* 187:26–32.
- 693 Floris G, Zhang L, Follesa P, Sun T (2017) Regulatory Role of Circular RNAs and  
694 Neurological Disorders. *Mol Neurobiol* 54:156–5165.
- 695 Gal-Mark N, Shallev L, Sweetat S, et al (2017) Abnormalities in A-to-I RNA editing patterns  
696 in CNS injuries correlate with dynamic changes in cell type composition. *Sci Rep*  
697 7:43421. doi: 10.1038/srep43421
- 698 Gallo A, Vukic D, Michalik D, et al (2017) ADAR RNA editing in human disease; more to it  
699 than meets the I. *Hum Genet* 136:1265–1278. doi: 10.1007/s00439-017-1837-0
- 700 Gallus GN, Cardaioli E, Rufa A, et al (2010) Alu-element insertion in an OPA1 intron  
701 sequence associated with autosomal dominant optic atrophy. *Mol Vis* 10:178–183.
- 702 GBD 2015 Neurological Disorders Collaborator Group 2015 NDC (2017) Global, regional,  
703 and national burden of neurological disorders during 1990-2015: a systematic analysis  
704 for the Global Burden of Disease Study 2015. *Lancet Neurol* 16:877–897. doi:  
705 10.1016/S1474-4422(17)30299-5
- 706 Giroto S, Cendron L, Bisaglia M, et al (2014) DJ-1 is a copper chaperone acting on SOD1  
707 activation. *J Biol Chem* 289:10887–99. doi: 10.1074/jbc.M113.535112

- 708 Glasser MF, Coalson TS, Robinson EC, et al (2016) A multi-modal parcellation of human  
709 cerebral cortex. *Nature* 536:171–178. doi: 10.1038/nature18933
- 710 Glinsky GV (2018) Contribution of transposable elements and distal enhancers to evolution  
711 of human-specific features of interphase chromatin architecture in embryonic stem cells.  
712 *Chromosome Res in press*
- 713 Goodier JL (2016) Restricting retrotransposons: a review. *Mob DNA* 7:16. doi:  
714 10.1186/s13100-016-0070-z
- 715 Gottschalk WK, Lutz MW, He YT, et al (2014) The broad impact of TOM40 on  
716 neurodegenerative diseases in aging. *J Parkinsons Dis Alzheimers Dis* 1.
- 717 Greenbaum L, Springer RR, Lutz MW, et al (2014) The TOMM40 poly-T rs10524523  
718 variant is associated with cognitive performance among non-demented elderly with type  
719 2 diabetes. *Eur Neuropsychopharmacol* 24:1492–1499.
- 720 Grover D, Majumder PP, Rao CB, et al (2003) Nonrandom Distribution of Alu Elements in  
721 Genes of Various Functional Categories: Insight from Analysis of Human  
722 Chromosomes 21 and 22. *Mol Biol Evol* 20:1420–1424. doi: 10.1093/molbev/msg153
- 723 Gu S, Yuan B, Campbell IM, et al (2015) Alu-mediated diverse and complex pathogenic  
724 copy-number variants within human chromosome 17 at p13.3. *Hum Mol Genet*  
725 24:4061–4077. doi: 10.1093/hmg/ddv146
- 726 Gu Y, Kodama H, Watanabe S, et al (2007) The first reported case of Menkes disease caused  
727 by an Alu insertion mutation. *Brain Dev* 29:105–108. doi:  
728 10.1016/j.braindev.2006.05.012
- 729 Gurevich I, Tamir H, Arango V, et al (2002) Altered editing of serotonin 2C receptor pre-  
730 mRNA in the prefrontal cortex of depressed suicide victims. *Neuron* 34:349–356. doi:  
731 10.1016/S0896-6273(02)00660-8
- 732 Hancks DC, Kazazian HH (2016) Roles for retrotransposon insertions in human disease. *Mob*  
733 *DNA* 7:1.
- 734 Harbauer AB, Zahedi RP, Sickmann A, et al (2014) The protein import machinery of  
735 mitochondria—a regulatory hub in metabolism, stress, and disease. *Cell Metab* 19:357–  
736 372.
- 737 Hardy J, Higgins G (1992) Alzheimer’s disease: the amyloid cascade hypothesis. *Science*  
738 (80- ) 256:184–185. doi: 10.1126/science.1566067
- 739 Hedges DJ, Callinan PA, Cordaux R, et al (2004) Differential Alu mobilization and  
740 polymorphism among the human and chimpanzee lineages. *Genome Res* 14:1068–1075.
- 741 Herrup K (2015) The case for rejecting the amyloid cascade hypothesis. *Nat Neurosci*  
742 18:794–799. doi: 10.1038/nn.4017
- 743 Hoenicka J, Arrasate M, de Yébenes JG, Avila J (2002) A two-hybrid screening of human  
744 Tau protein: interactions with Alu-derived domain. *Neuroreport* 13:343–9.
- 745 Hofer MJ, Campbell IL (2016) Immunoinflammatory diseases of the central nervous system -  
746 the tale of two cytokines. *Br J Pharmacol* 173:716–728. doi: 10.1111/bph.13175
- 747 Hood JL, Emeson RB (2011) Editing of Neurotransmitter Receptor and Ion Channel RNAs in  
748 the Nervous System. Springer, Berlin, Heidelberg, pp 61–90
- 749 Hormozdiari F, Konkel MK, Prado-Martinez J, et al (2013) Rates and patterns of great ape  
750 retrotransposition. *Proc Natl Acad Sci USA* 110:13457–62. doi:  
751 10.1073/pnas.1310914110
- 752 Huang LS, Ripps ME, Korman SH, et al (1989) Hypobetalipoproteinemia due to an  
753 apolipoprotein B gene exon 21 deletion derived by Alu-Alu recombination. *J Biol Chem*  
754 264:11394–400.
- 755 Hunter R, Gagnidze K, McEwen B, Pfaff D. (2015) Stress and the dynamic genome: steroids,  
756 epigenetics, and the transposome. *Proc Natl Acad Sci USA* 112:6828–6833.
- 757 Huda A, Mariño-Ramírez L, Landsman D, Jordan IK (2009) Repetitive DNA elements,

- 758 nucleosome binding and human gene expression. *Gene* 436:12–22.
- 759 Hwang T, Park C-K, Leung AKL, et al (2016) Dynamic regulation of RNA editing in human  
760 brain development and disease. *Nat Neurosci* 19:1093–9. doi: 10.1038/nn.4337
- 761 Ittner LM, Götz J (2011) Amyloid- $\beta$  and tau — a toxic pas de deux in Alzheimer’s disease.  
762 *Nat Rev Neurosci* 12:65–72. doi: 10.1038/nrn2967
- 763 Jackson JG, Robinson MB (2017) Regulation of mitochondrial dynamics in astrocytes:  
764 Mechanisms, consequences, and unknowns. *Glia*. doi: 10.1002/glia.23252
- 765 Jeck WR, Sorrentino JA, Wang K, et al (2013) Circular RNAs are abundant, conserved, and  
766 associated with ALU repeats. *RNA* 19:141–157. doi: 10.1261/rna.035667.112
- 767 Jiang J, Wu X, Shen D, et al (2017) Analysis of RP2 and RPGR Mutations in Five X-Linked  
768 Chinese Families with Retinitis Pigmentosa. *Sci Rep* 7:44465. doi: 10.1038/srep44465
- 769 Jintaridh P, Mutirangura A (2010) Distinctive patterns of age-dependent hypomethylation in  
770 interspersed repetitive sequences. *Physiol Genomics* 41:194–200.
- 771 Jintaridh P, Tungtrongchitr R, Preutthipan S, Mutirangura A (2013) Hypomethylation of Alu  
772 elements in post-menopausal women with osteoporosis. *PLoS One* 8:e70386. doi:  
773 10.1371/journal.pone.0070386
- 774 Jobic F, Morin G, Vincent-Delorme C, et al (2017) New intragenic rearrangements in non-  
775 Finnish mulibrey nanism. *Am J Med Genet Part A* 173:2782–2788. doi:  
776 10.1002/ajmg.a.38381
- 777 Johnson SC, Gonzalez B, Zhang Q, et al (2017) Network analysis of mitonuclear GWAS  
778 reveals functional networks and tissue expression profiles of disease-associated genes.  
779 *Hum Genet* 136:55–65. doi: 10.1007/s00439-016-1736-9
- 780 Kaler SG (2011) ATP7A-related copper transport diseases—emerging concepts and future  
781 trends. *Nat Rev Neurol* 7:15–29. doi: 10.1038/nrneurol.2010.180
- 782 Kaneko H, Dridi S, Tarallo V, et al (2011) DICER1 deficit induces Alu RNA toxicity in age-  
783 related macular degeneration. *Nature* 471:325–30. doi: 10.1038/nature09830
- 784 Kaur S, Pociot F (2015) Alu Elements as Novel Regulators of Gene Expression in Type 1  
785 Diabetes Susceptibility Genes? *Genes (Basel)* 6:577–591. doi: 10.3390/genes6030577
- 786 Kawahara Y, Ito K, Sun H, et al (2004) Glutamate receptors: RNA editing and death of motor  
787 neurons. *Nature* 427:801. doi: 10.1038/427801a
- 788 Khanna MR, Kovalevich J, Lee VMY, et al (2016) Therapeutic strategies for the treatment of  
789 tauopathies: Hopes and challenges. *Alzheimer’s Dement.* 12:1051–1065.
- 790 Khermesh K, D’Erchia AM, Barak M, et al (2016) Reduced levels of protein recoding by A-  
791 to-I RNA editing in Alzheimer’s disease. *RNA* 22:290–302. doi:  
792 10.1261/rna.054627.115
- 793 Kim J, Moody JP, Edgerly CK, et al (2010) Mitochondrial loss, dysfunction and altered  
794 dynamics in Huntington’s disease. *Hum Mol Genet* 19:3919–3935.
- 795 Kim Y, Tarallo V, Kerur N, et al (2014) DICER1/Alu RNA dysmetabolism induces Caspase-  
796 8-mediated cell death in age-related macular degeneration. *Proc Natl Acad Sci U S A*  
797 111:16082–7. doi: 10.1073/pnas.1403814111
- 798 Knight Johnson A, Schaefer GB, Lee J, et al (2017) Alu-mediated deletion of PIGL in a  
799 Patient with CHIME syndrome. *Am J Med Genet Part A* 173:1378–1382. doi:  
800 10.1002/ajmg.a.38181
- 801 Kubota-Sakashita M, Iwamoto K, Bundo M, Kato T (2014) A role of ADAR2 and RNA  
802 editing of glutamate receptors in mood disorders and schizophrenia. *Mol Brain* 7:5. doi:  
803 10.1186/1756-6606-7-5
- 804 Kurnosov AA, Ustyugova S V, Nazarov VI, et al (2015) The evidence for increased L1  
805 activity in the site of human adult brain neurogenesis. *PLoS One* 10:e0117854. doi:  
806 10.1371/journal.pone.0117854
- 807 Kuszak AJ, Jacobs D, Gurnev PA, et al (2015) Evidence of Distinct Channel Conformations

- 808 and Substrate Binding Affinities for the Mitochondrial Outer Membrane Protein  
809 Translocase Pore Tom40. *J Biol Chem* 290:26204–26217. doi:  
810 10.1074/jbc.M115.642173
- 811 Kutsche K, Ressler B, Katzera H, et al (2002) Characterization of breakpoint sequences of  
812 five rearrangements in L1CAM and ABCD1 (ALD) genes. *Hum Mutat* 19:526–535.
- 813 Kwak S, Kawahara Y (2005) Deficient RNA editing of GluR2 and neuronal death in  
814 amyotrophic lateral sclerosis. *J Mol Med (Berl)* 83:110–20. doi: 10.1007/s00109-004-  
815 0599-z
- 816 Lapp HE, Hunter RG (2016) The dynamic genome: transposons and environmental  
817 adaptation in the nervous system. *Epigenomics* 8:237–249.
- 818 Laperriere D, Wang T-T, White JH, Mader S (2007) Widespread Alu repeat-driven  
819 expansion of consensus DR2 retinoic acid response elements during primate evolution.  
820 *BMC Genomics* 8:23. doi: 10.1186/1471-2164-8-23
- 821 Larsen PA, Lutz MW, Hunnicutt KE, et al (2017) The Alu neurodegeneration hypothesis: A  
822 primate-specific mechanism for neuronal transcription noise, mitochondrial dysfunction,  
823 and manifestation of neurodegenerative disease. *Alzheimer's Dement.* 13:828–838.
- 824 Le Guennec K, Veugelen S, Quenez O, et al (2017) Deletion of exons 9 and 10 of the  
825 Presenilin 1 gene in a patient with Early-onset Alzheimer Disease generates longer  
826 amyloid seeds. *Neurobiol Dis* 104:97–103. doi: 10.1016/j.nbd.2017.04.020
- 827 Lehnert S, Loo P Van, Thilakarathne PJ, et al (2009) Evidence for Co-Evolution between  
828 Human MicroRNAs and Alu-Repeats. doi: 10.1371/journal.pone.0004456
- 829 Lerner T, Boustany RMN, Anderson JW, et al (1995) Isolation of a novel gene underlying  
830 Batten disease, CLN3. *Cell* 82:949–57.
- 831 Lev-Maor G, Sorek R, Shomron N, Ast G (2003) The birth of an alternatively spliced exon:  
832 3' splice-site selection in Alu exons. *Science* 300:1288–1291.
- 833 Li JB, Church GM (2013) Deciphering the functions and regulation of brain-enriched A-to-I  
834 RNA editing. *Nat Neurosci* 16:1518–1522. doi: 10.1038/nn.3539
- 835 Li, TH and Schmid CW (2001) Differential stress induction of individual Alu loci:  
836 implications for transcription and retrotransposition. *Gene* 276:135–141.
- 837 Li, W, Jin Y, Prazak L, et al (2012) Transposable elements in TDP-43-mediated  
838 neurodegenerative disorders. *PLOS One* e44099:1–10.
- 839 Li Z, Tian Y, Tian N, et al (2015) Aberrant alternative splicing pattern of ADAR2  
840 downregulates adenosine-to-inosine editing in glioma. *Oncol Rep* 33:2845–52. doi:  
841 10.3892/or.2015.3907
- 842 Lin L, Jiang P, Park JW, et al (2016) The contribution of Alu exons to the human proteome.  
843 *Genome Biol* 17:15.
- 844 Lin L, Shen S, Tye A, et al (2008) Diverse Splicing Patterns of Exonized Alu Elements in  
845 Human Tissues. *PLoS Genet* 4:e1000225. doi: 10.1371/journal.pgen.1000225
- 846 Lin MT, Beal MF (2006) Mitochondrial dysfunction and oxidative stress in  
847 neurodegenerative diseases. *Nature* 443:787–795.
- 848 Linker SB, Marchetto MC, Narvaiza I, et al (2017) Examining non-LTR retrotransposons in  
849 the context of the evolving primate brain. *BMC Biol* 15:68. doi: 10.1186/s12915-017-  
850 0409-z
- 851 Liscovitch N, Bazak L, Levanon EY, Chechik G (2014) Positive correlation between ADAR  
852 expression and its targets suggests a complex regulation mediated by RNA editing in the  
853 human brain. *RNA Biol* 11:1447–1456. doi: 10.4161/15476286.2014.992286
- 854 López E, Casasnovas C, Giménez J, et al (2015) Characterization of Alu and recombination-  
855 associated motifs mediating a large homozygous SPG7 gene rearrangement causing  
856 hereditary spastic paraplegia. *Neurogenetics* 16:97–105. doi: 10.1007/s10048-014-0429-  
857 6

- 858 Lu B (2009) Mitochondrial Dynamics and Neurodegeneration. *Curr Neurol Neurosci Rep*  
859 9:212.
- 860 Luco RF (2016) Retrotransposons jump into alternative-splicing regulation via a long  
861 noncoding RNA. *Nat Struct Mol Biol* 23:952–954. doi: 10.1038/nsmb.3318
- 862 Lutz MW, Crenshaw DG, Saunders AM, Roses AD (2010) Genetic variation at a single locus  
863 and age of onset for Alzheimer’s disease. *Alzheimer’s Dement* 6:125–131.
- 864 Lyall DM, Harris SE, Bastin ME, et al (2014) Alzheimer’s disease susceptibility genes  
865 APOE and TOMM40, and brain white matter integrity in the Lothian Birth Cohort 1936.  
866 *Neurobiol Aging*. doi: 10.1016/j.neurobiolaging.2014.01.006
- 867 Maas S, Kawahara Y, Tamburro KM, Nishikura K (2006) A-to-I RNA editing and human  
868 disease. *RNA Biol* 3:1–9.
- 869 Maden M (2007) Retinoic acid in the development, regeneration and maintenance of the  
870 nervous system. *Nat Rev Neurosci* 8:755–765. doi: 10.1038/nrn2212
- 871 Madsen E, Gitlin JD (2007) Copper and Iron Disorders of the Brain. *Annu Rev Neurosci*  
872 30:317–337. doi: 10.1146/annurev.neuro.30.051606.094232
- 873 Mager F, Gessmann D, Nussberger S, Zeth K (2011) Functional refolding and  
874 characterization of two Tom40 isoforms from human mitochondria. *J Membr Biol*  
875 242:11–21.
- 876 Mahley RW, Rall SC (2000) Apolipoprotein E: far more than a lipid transport protein. *Annu*  
877 *Rev Genomics Hum Genet* 1:507–537. doi: 10.1146/annurev.genom.1.1.507
- 878 Mamelì E, Lepori MB, Chiappe F, et al (2015) Wilson’s disease caused by alternative  
879 splicing and Alu exonization due to a homozygous 3039-bp deletion spanning from  
880 intron 1 to exon 2 of the ATP7B gene. 569:276–279.
- 881 Mariner PD, Walters RD, Espinoza CA, et al (2008) Human Alu RNA is a modular  
882 transacting repressor of mRNA transcription during heat shock. *Mol Cell* 29:499–509.
- 883 Martin LJ (2012) Biology of mitochondria in neurodegenerative diseases. *Prog Mol Biol*  
884 *Transl Sci* 107:355–415. doi: 10.1016/B978-0-12-385883-2.00005-9
- 885 Mattick JS, Mehler MF (2008) RNA editing, DNA recoding and the evolution of human  
886 cognition. *Trends Neurosci* 31:227–33. doi: 10.1016/j.tins.2008.02.003
- 887 McKhann GM, Knopman DS, Chertkow H, et al (2011) The diagnosis of dementia due to  
888 Alzheimer’s disease: Recommendations from the National Institute on Aging-  
889 Alzheimer’s Association workgroups on diagnostic guidelines for Alzheimer’s disease.  
890 *Alzheimer’s Dement*. 7:263–269.
- 891 Mefford HC, Zemel M, Geraghty E, et al (2015) Intragenic deletions of ALDH7A1 in  
892 pyridoxine-dependent epilepsy caused by Alu-Alu recombination. *Neurology* 85:756–  
893 62. doi: 10.1212/WNL.0000000000001883
- 894 Mehler MF, Mattick JS (2007) Noncoding RNAs and RNA editing in brain development,  
895 functional diversification, and neurological disease. *Physiol Rev* 87:799–823.
- 896 Mirza AH, Kaur S, Brorsson CA, Pociot F (2014) Effects of GWAS-associated genetic  
897 variants on lncRNAs within IBD and T1D candidate loci. *PLoS One*. doi:  
898 10.1371/journal.pone.0105723
- 899 Mita P, Boeke JD (2016) How retrotransposons shape genome regulation. *Curr Opin Genet*  
900 *Dev* 37:90–100. doi: 10.1016/j.gde.2016.01.001
- 901 Mittal K, Mani RJ, Katara DP (2016) Type 3 Diabetes: Cross Talk between Differentially  
902 Regulated Proteins of Type 2 Diabetes Mellitus and Alzheimer’s Disease. *Sci Rep*  
903 6:25589. doi: 10.1038/srep25589
- 904 Morais S, Bastos-Ferreira R, Sequeiros J, Alonso I (2016) Genomic mechanisms underlying  
905 PARK2 large deletions identified in a cohort of patients with PD. *Neurol Genet* 2:e73.  
906 doi: 10.1212/NXG.0000000000000073
- 907 Muotri AR, Chu VT, Marchetto MCN, et al (2005) Somatic mosaicism in neuronal precursor

- 908 cells mediated by L1 retrotransposition. *Nature* 435:903–910.
- 909 Muotri AR, Marchetto MCN, Coufal NG, et al (2010) L1 retrotransposition in neurons is  
910 modulated by MeCP2. *Nature* 468:443–446. doi: 10.1038/nature09544
- 911 Mustajoki S, Ahola H, Mustajoki P, Kauppinen R (1999) Insertion of Alu element  
912 responsible for acute intermittent porphyria. *Hum Mutat* 13:431–8.
- 913 Neeman Y, Levanon EY, Jantsch MF, Eisenberg E (2006) RNA editing level in the mouse is  
914 determined by the genomic repeat repertoire. *RNA* 12:1802–9. doi: 10.1261/rna.165106
- 915 Neven KY, Piola M, Angelici L, et al (2016) Repetitive element hypermethylation in  
916 multiple sclerosis patients. *BMC Genet* 17:84. doi: 10.1186/s12863-016-0395-0
- 917 Nishikura K (2016) A-to-I editing of coding and non-coding RNAs by ADARs. *Nat Rev Mol*  
918 *Cell Biol* 17:83–96. doi: 10.1038/nrm.2015.4
- 919 Norris J, Fan D, Aleman C, et al (1995) Identification of a new subclass of Alu DNA repeats  
920 which can function as estrogen receptor-dependent transcriptional enhancers. *J Biol*  
921 *Chem* 270:22777–82. doi: 10.1074/JBC.270.39.22777
- 922 Nozu K, Iijima K, Ohtsuka Y, et al (2014) Alport syndrome caused by a COL4A5 deletion  
923 and exonization of an adjacent AluY. *Mol Genet genomic Med* 2:451–453.
- 924 Okubo M, Horinishi A, Saito M, et al (2007) A novel complex deletion–insertion mutation  
925 mediated by Alu repetitive elements leads to lipoprotein lipase deficiency. *Mol Genet*  
926 *Metab* 92:229–233. doi: 10.1016/J.YMGME.2007.06.018
- 927 Oliver KR, Greene WK (2011) Mobile DNA and the TE-Thrust hypothesis: supporting  
928 evidence from the primates. *Mob DNA* 2:8. doi: 10.1186/1759-8753-2-8
- 929 Ottesen EW, Seo J, Singh NN, Singh RN (2017) A Multilayered Control of the Human  
930 Survival Motor Neuron Gene Expression by Alu Elements. *Front Microbiol* 8:2252. doi:  
931 10.3389/fmicb.2017.02252
- 932 Pal S, Tyler JK (2016) Epigenetics and aging. *Sci Adv* 2:e1600584–e1600584. doi:  
933 10.1126/sciadv.1600584
- 934 Pandolfo M (2006) Friedreich Ataxia: Detection of GAA Repeat Expansions and Frataxin  
935 Point Mutations. In: *Congenital Heart Disease*. Humana Press, New Jersey, pp 197–216
- 936 Paquola ACM, Erwin JA, Gage FH (2016) Insights into the role of somatic mosaicism in the  
937 brain. *Current Opinion in Systems Biology* 1:90-94.
- 938 Payer LM, Steranka JP, Yang WR, et al (2017) Structural variants caused by Alu insertions  
939 are associated with risks for many human diseases. *Proc Natl Acad Sci USA*  
940 114:E3984–E3992. doi: 10.1073/pnas.1704117114
- 941 Pehlivan D, Beck CR, Okamoto Y, et al (2016) The role of combined SNV and CNV burden  
942 in patients with distal symmetric polyneuropathy. *Genet Med* 18:443–451. doi:  
943 10.1038/gim.2015.124
- 944 Petschner P, Gonda X, Baksa D, et al (2017) Genes linking mitochondrial function, cognitive  
945 impairment and depression are associated with endophenotypes serving precision  
946 medicine. *Neuroscience*. doi: 10.1016/J.NEUROSCIENCE.2017.09.049
- 947 Picardi E, D’Erchia AM, Lo Giudice C, Pesole G (2017a) REDiportal: a comprehensive  
948 database of A-to-I RNA editing events in humans. *Nucleic Acids Res* 45:D750–D757.  
949 doi: 10.1093/nar/gkw767
- 950 Picardi E, Horner DS, Pesole G (2017b) Single-cell transcriptomics reveals specific RNA  
951 editing signatures in the human brain. *RNA* 23:860–865. doi: 10.1261/rna.058271.116
- 952 Picardi E, Manzari C, Mastropasqua F, et al (2015) Profiling RNA editing in human tissues:  
953 towards the inosinome Atlas. *Sci Rep* 5:14941. doi: 10.1038/srep14941
- 954 Polak P, Domany E (2006) Alu elements contain many binding sites for transcription factors  
955 and may play a role in regulation of developmental processes. *BMC Genomics* 7:133.  
956 doi: 10.1186/1471-2164-7-133
- 957 Prendergast JGD, Chambers E V, Semple CAM (2014) Sequence-level mechanisms of

- 958 human epigenome evolution. *Genome Biol Evol* 6:1758–71. doi: 10.1093/gbe/evu142
- 959 Prudencio M, Gonzales PK, Cook CN, et al (2017) Repetitive element transcripts are  
960 elevated in the brain of C9orf72 ALS/FTLD patients. *Hum Mol Genet* 26:3421–3431.  
961 doi: 10.1093/hmg/ddx233
- 962 Prüfer K, Munch K, Hellmann I, et al (2012) The bonobo genome compared with the  
963 chimpanzee and human genomes. *Nature* 486:nature11128. doi: 10.1038/nature11128
- 964 Reddy PH (2011) Abnormal tau, mitochondrial dysfunction, impaired axonal transport of  
965 mitochondria, and synaptic deprivation in Alzheimer’s disease. *Brain Res.* 1415:136–  
966 148.
- 967 Reynolds WF, Rhees J, Maciejewski D, et al (1999) Myeloperoxidase Polymorphism Is  
968 Associated with Gender Specific Risk for Alzheimer’s Disease. *Exp Neurol* 155:31–41.  
969 doi: 10.1006/exnr.1998.6977
- 970 Rezin GT, Amboni G, Zugno AI, et al (2009) Mitochondrial Dysfunction and Psychiatric  
971 Disorders. *Neurochem Res* 34:1021–1029. doi: 10.1007/s11064-008-9865-8
- 972 Rice GI, Kasher PR, Forte GMA, et al (2012) Mutations in ADAR1 cause Aicardi-Goutières  
973 syndrome associated with a type I interferon signature. *Nat Genet* 44:1243–8. doi:  
974 10.1038/ng.2414
- 975 Roger AJ, Muñoz-Gómez SA, Kamikawa R (2017) The Origin and Diversification of  
976 Mitochondria. *Curr Biol* 27:R1177–R1192. doi: 10.1016/j.cub.2017.09.015
- 977 Roses AD (2010) An inherited variable poly-T repeat genotype in TOMM40 in Alzheimer  
978 disease. *Arch Neurol* 67:536–541.
- 979 Roses AD, Sundseth S, Saunders A, et al (2016a) Understanding the genetics of APOE and  
980 TOMM40 and role of mitochondrial structure and function in clinical pharmacology of  
981 Alzheimer’s disease. *Alzheimers Dement* 12:687–694. doi: 10.1016/j.jalz.2016.03.015
- 982 Roses AD, Akkari PA, Chiba-Falek O, et al (2016b) Structural variants can be more  
983 informative for disease diagnostics, prognostics and translation than current SNP  
984 mapping and exon sequencing. *Expert Opin Drug Metab Toxicol* 12:135–147. doi:  
985 10.1517/17425255.2016.1133586
- 986 Roses AD, Lutz MW, Amrine-Madsen H, et al (2010) A TOMM40 variable-length  
987 polymorphism predicts the age of late-onset Alzheimer’s disease. *Pharmacogenomics J*  
988 10:375–384.
- 989 Ross CA, Poirier MA (2004) Protein aggregation and neurodegenerative disease. *Nat Med*  
990 S10-17.
- 991 Rossi L, Lombardo MF, Ciriolo MR, Rotilio G (2004) Mitochondrial Dysfunction in  
992 Neurodegenerative Diseases Associated with Copper Imbalance. *Neurochem. Res.*  
993 29:493–504.
- 994 Rugarli EI, Langer T (2012) Mitochondrial quality control: a matter of life and death for  
995 neurons. *EMBO J* 31:1336–1349.
- 996 Rybak-Wolf A, Stottmeister C, Glazar P, et al (2015) Circular RNAs in the Mammalian  
997 Brain Are Highly Abundant, Conserved, and Dynamically Expressed. *Mol Cell* 58: 870–  
998 885.
- 999 Sakurai M, Ueda H, Yano T, et al (2014) A biochemical landscape of A-to-I RNA editing in  
1000 the human brain transcriptome. *Genome Res* 24:522–34. doi: 10.1101/gr.162537.113
- 1001 Saunders AM, Schmeider K, Breitner JC, et al (1993) Apolipoprotein E epsilon 4 allele  
1002 distributions in late-onset Alzheimer’s disease and in other amyloid-forming diseases.  
1003 *Lancet* (London, England) 342:710–1. doi: 10.1016/0140-6736(93)91709-U
- 1004 Schanze D, Neubauer D, Cormier-Daire V, et al (2014) Deletions in the 3’ Part of the *NFIX*  
1005 Gene Including a Recurrent Alu-Mediated Deletion of Exon 6 and 7 Account for  
1006 Previously Unexplained Cases of Marshall-Smith Syndrome. *Hum Mutat* 35:1092–  
1007 1100. doi: 10.1002/humu.22603

- 1008 Schmauss C, Howe JR (2002) RNA editing of neurotransmitter receptors in the mammalian  
1009 brain. *Sci STKE* 2002:pe26. doi: 10.1126/stke.2002.133.pe26
- 1010 Schneider I, Kugel H, Redlich R, et al. (2017) Association of Serotonin Transporter Gene  
1011 AluJb Methylation with Major Depression, Amygdala Responsiveness, 5-  
1012 HTTLP/ rs25531 Polymorphism, and Stress. *Neuropsychopharmacology online early*  
1013 1–9. doi:10.1038/npp.2017.273
- 1014 Schollen E, Keldermans L, Foulquier F, et al (2007) Characterization of two unusual  
1015 truncating PMM2 mutations in two CDG-Ia patients. *Mol Genet Metab* 90:408–413.  
1016 doi: 10.1016/j.ymgme.2007.01.003
- 1017 Schwahn U, Lenzner S, Dong J, et al (1998) Positional cloning of the gene for X-linked  
1018 retinitis pigmentosa 2. *Nat Genet* 19:327–32. doi: 10.1038/1214
- 1019 Schwarz TL (2013) Mitochondrial trafficking in neurons. *Cold Spring Harb Perspect Biol*  
1020 5:a011304.
- 1021 Seeley WW (2017) Mapping Neurodegenerative Disease Onset and Progression. *Cold Spring*  
1022 *Harb Perspect Biol* 9:a023622. doi: 10.1101/cshperspect.a023622
- 1023 Selkoe DJ (2000) Toward a comprehensive theory for Alzheimer’s disease. Hypothesis:  
1024 Alzheimer’s disease is caused by the cerebral accumulation and cytotoxicity of amyloid  
1025 beta-protein. *Ann N Y Acad Sci* 924:17–25. doi: 10.1111/j.1749-6632.2000.tb05554.x
- 1026 Shen S, Lin L, Cai JJ, et al (2011) Widespread establishment and regulatory impact of Alu  
1027 exons in human genes. *Proc Natl Acad Sci* 108:2837–2842.
- 1028 Shiota T, Imai K, Qiu J, et al (2015) Molecular architecture of the active mitochondrial  
1029 protein gate. *Science* 349:1544–1548.
- 1030 Shpyleva S, Melnyk S, Pavliv O, et al (2017) Overexpression of LINE-1 Retrotransposons in  
1031 Autism Brain. *Mol Neurobiol* 1–10. doi: 10.1007/s12035-017-0421-x
- 1032 Skovronsky DM, Doms RW, Lee VM (1998) Detection of a novel intraneuronal pool of  
1033 insoluble amyloid beta protein that accumulates with time in culture. *J Cell Biol*  
1034 141:1031–9.
- 1035 Smalheiser NR (2014) The RNA-centred view of the synapse: non-coding RNAs and  
1036 synaptic plasticity. *Philos Trans R Soc B Biol Sci* 369:20130504–20130504. doi:  
1037 10.1098/rstb.2013.0504
- 1038 Soibam B (2017) Super-lncRNAs: identification of lncRNAs that target super-enhancers via  
1039 RNA:DNA:DNA triplex formation. *RNA* 23:1729–1742.
- 1040 Steen E, Terry BM, Rivera EJ, et al (2005) Impaired insulin and insulin-like growth factor  
1041 expression and signaling mechanisms in Alzheimer’s disease--is this type 3 diabetes? *J*  
1042 *Alzheimers Dis* 7:63–80.
- 1043 Strittmatter WJ, Saunders AM, Schmechel D, et al (1993) Apolipoprotein E: high-avidity  
1044 binding to beta-amyloid and increased frequency of type 4 allele in late-onset familial  
1045 Alzheimer disease. *Proc Natl Acad Sci* 90:1977–1981. doi: 10.1073/pnas.90.5.1977
- 1046 Sun Z, Wu Y, Ordog T, et al (2014) Aberrant signature methylome by DNMT1 hot spot  
1047 mutation in hereditary sensory and autonomic neuropathy 1E. *Epigenetics* 9:1184–1193.  
1048 doi: 10.4161/epi.29676
- 1049 Swerdlow RH (2017) Mitochondria and Mitochondrial Cascades in Alzheimer’s Disease. *J*  
1050 *Alzheimer’s Dis Preprint*:1–14. doi: 10.3233/JAD-170585
- 1051 Swerdlow RH, Burns JM, Khan SM (2010) The Alzheimer’s disease mitochondrial cascade  
1052 hypothesis. *J Alzheimer’s Dis JAD* 20:265.
- 1053 Szpakowski S, Sun X, Lage JM, et al (2009) Loss of epigenetic silencing in tumors  
1054 preferentially affects primate-specific retroelements. *Gene* 448:151–67. doi:  
1055 10.1016/j.gene.2009.08.006
- 1056 Takahashi RH, Milner TA, Li F, et al (2002) Intraneuronal Alzheimer abeta42 accumulates in  
1057 multivesicular bodies and is associated with synaptic pathology. *Am J Pathol* 161:1869–



- 1058 79.
- 1059 Tan B, Huang H, Lam R, Soong T (2009) Dynamic regulation of RNA editing of ion  
1060 channels and receptors in the mammalian nervous system. *Mol Brain* 2:13. doi:  
1061 10.1186/1756-6606-2-13
- 1062 Tan MH, Li Q, Shanmugam R, et al (2017) Dynamic landscape and regulation of RNA  
1063 editing in mammals. *Nature* 550:249–254. doi: 10.1038/nature24041
- 1064 Tarallo V, Hirano Y, Gelfand BD, et al (2012) DICER1 loss and Alu RNA induce age-related  
1065 macular degeneration via the NLRP3 inflammasome and MyD88. *Cell* 149:847–59. doi:  
1066 10.1016/j.cell.2012.03.036
- 1067 Tariq A, Jantsch MF (2012) Transcript diversification in the nervous system: A to I RNA  
1068 editing in CNS function and disease development. *Front Neurosci* 1–13. doi:  
1069 10.3389/fnins.2012.00099
- 1070 Taşkesen M, Collin GB, Evsikov A V, et al (2012) Novel Alu retrotransposon insertion  
1071 leading to Alström syndrome. *Hum Genet* 131:407–13. doi: 10.1007/s00439-011-1083-9
- 1072 Thongsroy J, Patchsung M, Mutirangura A (2017) The association between Alu  
1073 hypomethylation and severity of type 2 diabetes mellitus. *Clin Epigenetics* 9:93. doi:  
1074 10.1186/s13148-017-0395-6
- 1075 Töhönen V, Katayama S, Vesterlund L, et al (2015) Novel PRD-like homeodomain  
1076 transcription factors and retrotransposon elements in early human development. *Nat*  
1077 *Commun* 6:8207. doi: 10.1038/ncomms9207
- 1078 Tsirigos A, Rigoutsos I (2009) Alu and B1 Repeats Have Been Selectively Retained in the  
1079 Upstream and Intronic Regions of Genes of Specific Functional Classes. *PLOS Comput*  
1080 *Biol* 5:e1000610. doi: 10.1371/JOURNAL.PCBI.1000610
- 1081 Udaka T, Okamoto N, Aramaki M, et al (2007) An Alu retrotransposition-mediated deletion  
1082 of CHD7 in a patient with CHARGE syndrome. *Am J Med Genet Part A* 143:721–726.  
1083 doi: 10.1002/ajmg.a.31441
- 1084 Ullu E, Tschudi C (1984) Alu sequences are processed 7SL RNA genes. *Nature* 312:171–  
1085 172. doi: 10.1038/312171a0
- 1086 Van Den Heuvel MP, Sporns O (2013) Network hubs in the human brain. *Trends Cogn Sci*  
1087 17:683–696. doi: 10.1016/j.tics.2013.09.012
- 1088 Vandewalle J, Bauters M, Van Esch H, et al (2013) The mitochondrial solute carrier  
1089 SLC25A5 at Xq24 is a novel candidate gene for non-syndromic intellectual disability.  
1090 *Hum Genet* 132:1177–1185.
- 1091 Vansant G, Reynolds WF (1995) The consensus sequence of a major Alu subfamily contains  
1092 a functional retinoic acid response element. *Proc Natl Acad Sci U S A* 92:8229–33.
- 1093 Varizhuk AM, Sekridova AV, Tankevich MV, et al (2016) Conformational polymorphism of  
1094 G-rich fragments of DNA Alu-repeats. II. the putative role of G-quadruplex structures in  
1095 genomic rearrangements. *Biomeditsinskaya Khimiya* 62:630–637. doi:  
1096 10.18097/pbmc20166206630
- 1097 Varshney D, Vavrova-Anderson J, Oler AJ, et al (2015) SINE transcription by RNA  
1098 polymerase III is suppressed by histone methylation but not by DNA methylation.
- 1099 Vassetzky NS, Ten OA, Kramerov DA (2003) B1 and related SINEs in mammalian genomes.  
1100 *Gene* 319:149–60.
- 1101 Viader A, Golden JP, Baloh RH, et al (2011) Schwann cell mitochondrial metabolism  
1102 supports long-term axonal survival and peripheral nerve function. *J Neurosci* 31:10128–  
1103 40. doi: 10.1523/JNEUROSCI.0884-11.2011
- 1104 Viader A, Sasaki Y, Kim S, et al (2013) Aberrant Schwann cell lipid metabolism linked to  
1105 mitochondrial deficits leads to axon degeneration and neuropathy. *Neuron* 77:886–98.  
1106 doi: 10.1016/j.neuron.2013.01.012
- 1107 Wang W, Li L, Lin W, et al (2013) The ALS disease-associated mutant TDP-43 impairs

- 1108 mitochondrial dynamics and function in motor neurons. *Hum Mol Genet* 22:4706–4719.  
1109 Wang W, Wang WH, Azadzoï KM, et al. (2016) Alu RNA accumulation in hyperglycemia  
1110 augments oxidative stress and impairs eNOS and SOD2 expression in endothelial cells.  
1111 *Mol Cell Endocrinol* 426:91–100.  
1112 Weissmann D, van der Laan S, Underwood MD, et al (2016) Region-specific alterations of  
1113 A-to-I RNA editing of serotonin 2c receptor in the cortex of suicides with major  
1114 depression. *Transl Psychiatry* 6:e878. doi: 10.1038/tp.2016.121  
1115 Wimmer K, Callens T, Wernstedt A, Messiaen L (2011) The NF1 gene contains hotspots for  
1116 L1 endonuclease-dependent De Novo insertion. *PLoS Genet*. doi:  
1117 10.1371/journal.pgen.1002371  
1118 Wright A, Vissel B (2012) The essential role of AMPA receptor GluR2 subunit RNA editing  
1119 in the normal and diseased brain. *Front Mol Neurosci* 5:34. doi:  
1120 10.3389/fnmol.2012.00034  
1121 Wu S-J, Hsieh T-J, Kuo M-C, et al (2013) Functional regulation of Alu element of human  
1122 angiotensin-converting enzyme gene in neuron cells. *Neurobiol Aging* 34:1921.e1-  
1123 1921.e7. doi: 10.1016/j.neurobiolaging.2013.01.003  
1124 Zempel H, Mandelkow E (2015) Tau missorting and spastin-induced microtubule disruption  
1125 in neurodegeneration: Alzheimer disease and hereditary spastic paraplegia. *Mol*  
1126 *Neurodegener* 10:68. doi: 10.1186/s13024-015-0064-1  
1127 Zhang G, Fukao T, Sakurai S, et al (2006) Identification of Alu-mediated, large deletion-  
1128 spanning exons 2-4 in a patient with mitochondrial acetoacetyl-CoA thiolase deficiency.  
1129 *Mol Genet Metab* 89:222–6. doi: 10.1016/j.ymgme.2006.06.010  
1130 Zhang Y-H, Dipple KM, Vilain E, et al (2000) AluY insertion (IVS4-52ins316alu) in the  
1131 glycerol kinase gene from an individual with benign glycerol kinase deficiency. *Hum*  
1132 *Mutat* 15:316–323. doi: 10.1002/(SICI)1098-1004(200004)15:4<316::AID-  
1133 HUMU3>3.0.CO;2-9  
1134  
1135

1136

## 1137 **Figure Legends**

1138

1139 **Figure 1.** Select mechanisms whereby *Alu* elements can alter gene expression and function

1140 (also see Elbarbary et al. 2016). **A:** Sequence homology and orientation of *Alu* elements

1141 contributes to the formation of distinct secondary structures in both DNA and RNA. DNA

1142 *Alu* G-quadruplex structures can alter transcription kinetics (Varizhuk et al. 2016) and pre-

1143 mRNA *Alu* binding forms stem-loop structures that are the primary site for A-to-I editing

1144 (see Figure 2). **B:** Recombination of intra-gene *Alu* elements resulting in exon deletion. **C:**

1145 Exonification of intronic *Alus* contributing to the production of alternative mRNAs. **D:**

1146 Environmental or traumatic stress cascades resulting in increased expression of *Alu* RNAs

1147 that contribute to inflammation (Li and Schmid 2001; Tarallo et al. 2012; Hunter et al. 2015;  
1148 Lapp et al. 2016), the disruption of global gene transcription through Pol II binding (Mariner  
1149 et al. 2008), and an increase of H3K9 histone methylation that alters *Alu* epigenetic pathways  
1150 (Varshney et al. 2015; Lapp and Hunter 2016; Larsen et al. 2017).

1151

1152 **Figure 2.** Intronic *Alu* elements located in close proximity (**A**) can bind to each other within  
1153 pre-mRNAs (**B**) thereby producing a stable stem-loop secondary structure that is the primary  
1154 substrate for A-to-I editing in primates. ADAR proteins bind to pre-mRNA *Alu* structures  
1155 (**C**) and convert adenosine residues to inosine. If occurring in coding regions, the translation  
1156 machinery then interprets the inosine residues as guanosine and this can contribute to amino  
1157 acid changes and alternative protein conformations (**D**).

1158

1159 **Figure 3.** Deleterious *Alu* activity operating on mitonuclear genes can disrupt mitochondrial  
1160 function in the CNS and contribute to a number of diseased phenotypes (see Table 1). The  
1161 type and severity of associated neurological and neurodegenerative disorders depends on the  
1162 deleterious *Alu* mechanism of action, the mitonuclear gene pathways involved, the time or  
1163 developmental stage of induction, level or severity of traumatic stress, and tissue specificity  
1164 (see Larsen et al. 2017). If operating across the suite of mitonuclear genes through epigenetic  
1165 pathways, the mechanism helps to explain the origin of incipient mitochondrial stress and  
1166 CNS connectome destabilization that is observed across the spectrum of neurological and  
1167 neurodegenerative disorders.

1168

1169

1170

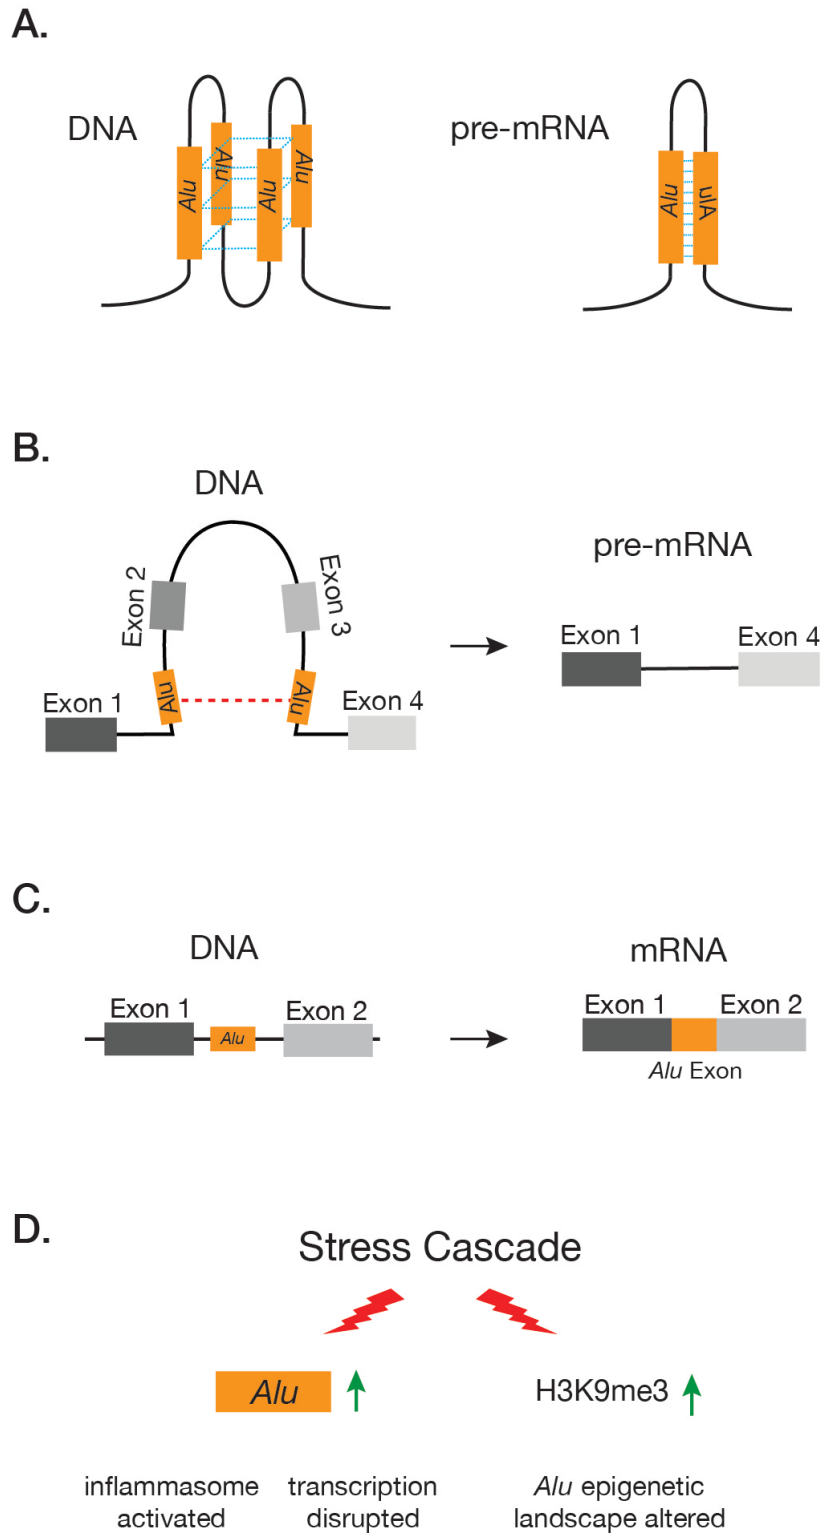

1171

1172

1173 **Figure 1.**

1174

1175

1176

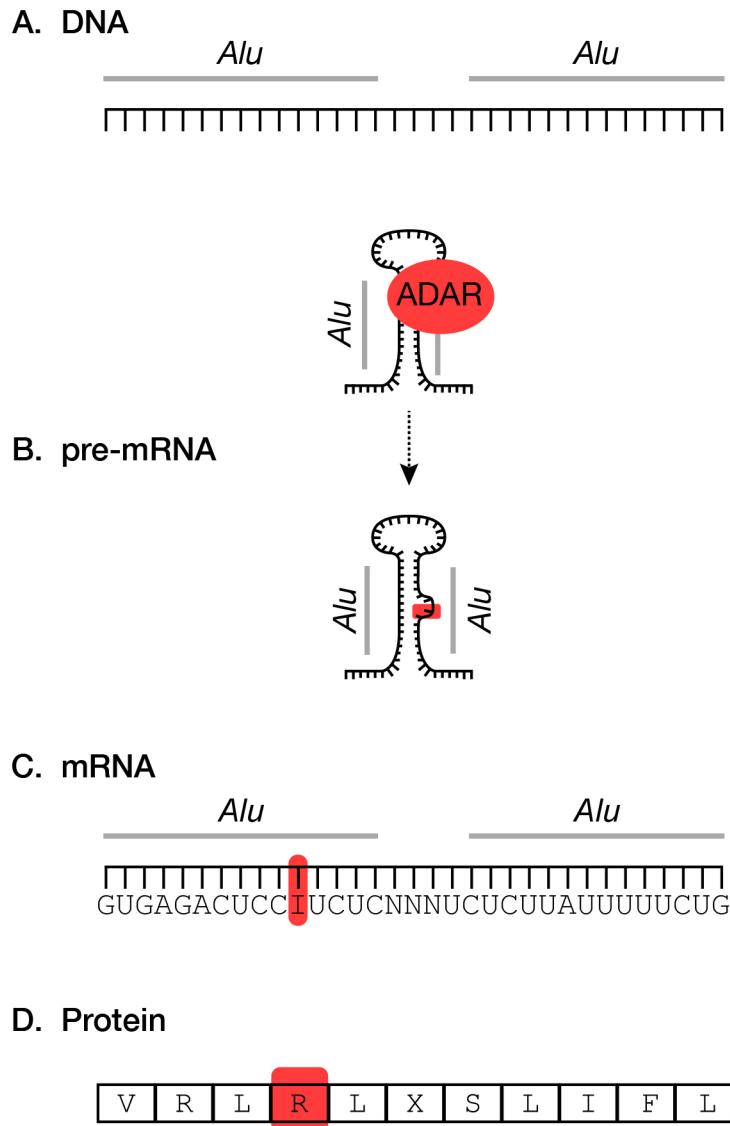

1177

1178

1179 **Figure 2.**

1180

1181

1182

1183

1184

1185

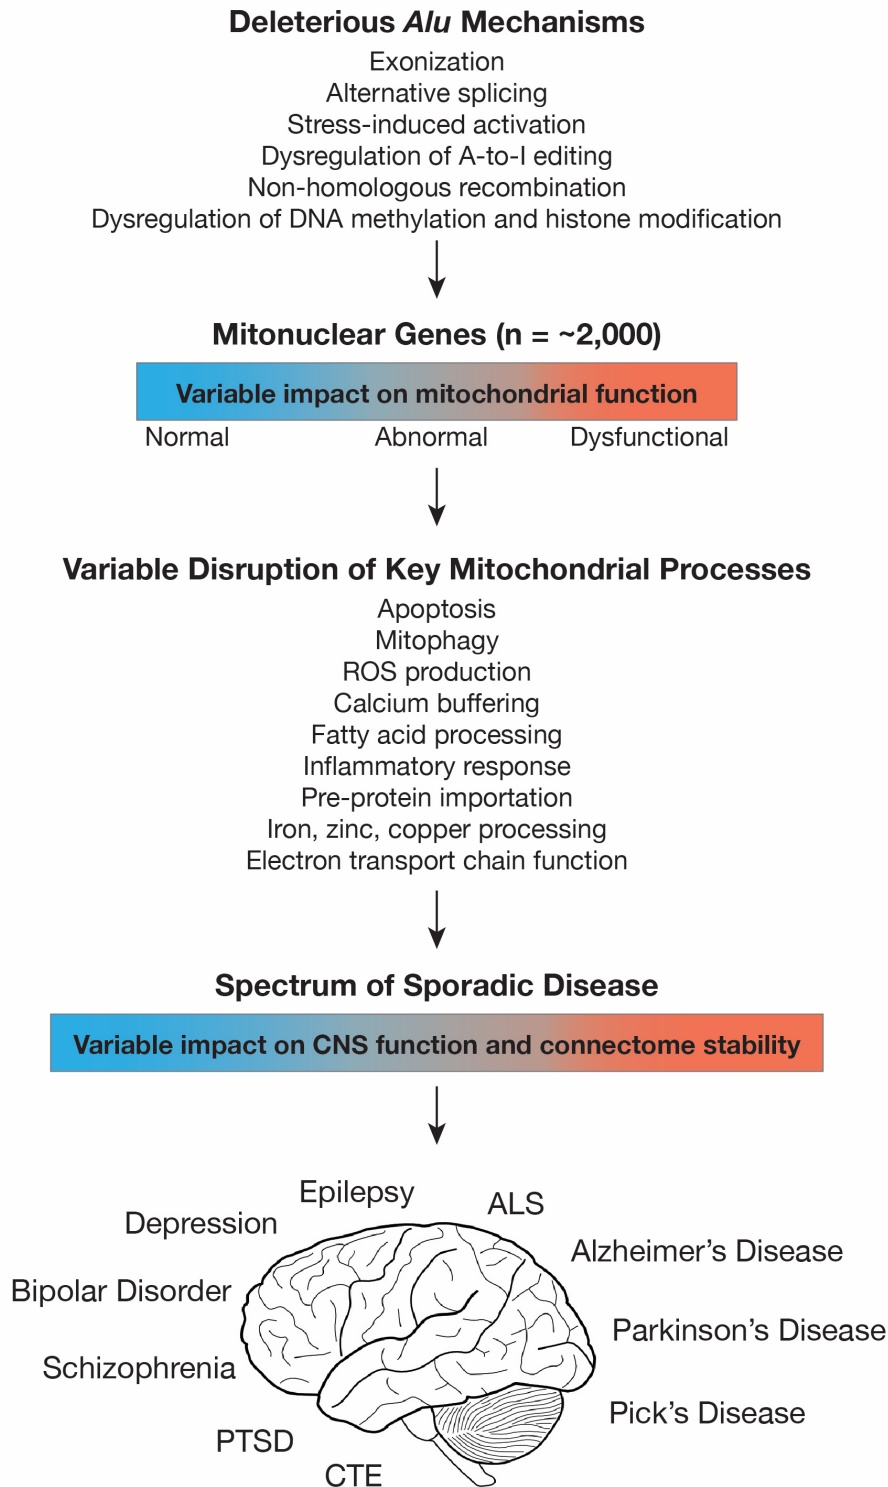

1186

1187

1188

1189

1190 **Figure 3.**

**Table 1.** Genes associated with neurological and neurodegenerative disorders wherein deleterious *Alu* activity has been documented experimentally or is hypothesized to disrupt gene function. Gene names in bold identify genes essential for mitochondrial function and transport and/or are associated with mitochondrial abnormalities (*sensu* Dawson et al. 1995, Calvo et al. 2015, Zempel and Mandelkow 2015, Bhattacharjee et al. 2016, Chong-Chong et al. 2016, Checler et al. 2017, Johnson et al. 2017, Wang et al. 2013). For additional *Alu* associated diseases see Hancks and Kazazian (2016) and Payer et al. (2017). Asterisks identify genes where mutations result in dysregulation of *Alu* elements.

| Gene Name           | Disorder                                          | <i>Alu</i> Mechanism of Disruption                          | Reference                                 |
|---------------------|---------------------------------------------------|-------------------------------------------------------------|-------------------------------------------|
| <b>ABCD1</b>        | Adrenoleukodystrophy                              | Deletion events                                             | Kutsche et al. 2002                       |
| <b>ACAT1 (T2)</b>   | Mitochondrial acetoacetyl-CoA thiolase deficiency | Deletion event                                              | Zhang et al. 2006                         |
| ACE                 | Alzheimer's disease                               | Insertion events                                            | Wu et al. 2013                            |
| ADAR2               | Glioma                                            | Exonization                                                 | Li et al. 2015                            |
| <b>ALDH7A1</b>      | Pyridoxine-dependent epilepsy                     | Recombination                                               | Mefford et al. 2015                       |
| ALMS1               | Alström syndrome                                  | Insertion event                                             | Taşkesen et al. 2012                      |
| APOB                | Hypobetalipoproteinemia                           | Recombination                                               | Huang et al. 1989                         |
| <b>ATP5J</b>        | Alzheimer's disease                               | Duplication                                                 | Antonell et al. 2012                      |
| <b>ATP7A</b>        | Menkes disease                                    | Insertion event                                             | Gu et al. 2007; Bhattacharjee et al. 2016 |
| <b>ATP7B</b>        | Wilson's disease                                  | Alternative splicing                                        | Mameli et al. 2015                        |
| <b>C9orf72</b>      | ALS, FTLN                                         | Loss of epigenetic control, elevated <i>Alu</i> transcripts | Prudencio et al. 2017                     |
| CHD7                | CHARGE syndrome                                   | Deletion                                                    | Udaka et al. 2007                         |
| <b>CLN3</b>         | Batten disease                                    | Deletion                                                    | Lerner et al. 1995                        |
| COL4A5              | Alport syndrome                                   | Deletion and exonization                                    | Nozu et al. 2014                          |
| DICER1*             | Age-related macular degeneration                  | <i>Alu</i> RNA build-up with reduced DICER1 activity        | Kaneko et al. 2011; Kim et al. 2014       |
| <b>FXN</b>          | Friedreich's Ataxia                               | <i>Alu</i> repeat expansion, alternative splicing events    | Pandolfo 2006                             |
| <b>GK</b>           | Glycerol kinase deficiency                        | Insertion event                                             | Zhang et al. 2000                         |
| GLA                 | Fabry disease                                     | Deletion event                                              | Dobrovolny et al. 2011                    |
| HPRT                | Lesch-Nyhan disease                               | Recombination                                               | Brooks et al. 2001                        |
| <b>HMBS</b>         | Acute intermittent porphyria                      | Insertion event                                             | Mustajoki et al. 1999                     |
| LPL                 | Lipoprotein lipase deficiency                     | Complex deletion-insertion                                  | Okubo et al. 2007                         |
| <b>MFN2 (CMT2a)</b> | Charcot-Marie-Tooth type 2A                       | Copy number variants                                        | Pehlivan et al. 2016                      |
| MPO                 | Alzheimer's disease                               | <i>Alu</i> hormone response variant; estrogen dysregulation | Reynolds et al. 1999                      |

|                      |                                               |                                                                   |                                         |
|----------------------|-----------------------------------------------|-------------------------------------------------------------------|-----------------------------------------|
| <b>NDUFS2</b>        | Leigh Syndrome                                | Exonization                                                       | Larsen et al. 2017                      |
| NF1                  | Neurofibromatosis type I                      | Deletion and chimeric gene fusion                                 | Wimmer et al. 2011; Ferrari et al. 2017 |
| NFIX                 | Marshall-Smith syndrome                       | Deletions                                                         | Schanze et al. 2014                     |
| <b>OPA1</b>          | Autosomal Dominant Optic Atrophy              | Alternative splicing events                                       | Gallus et al. 2010                      |
| <b>PARK2</b>         | Parkinson's disease                           | Recombination                                                     | Morais et al. 2016                      |
| <b>PARK7 (DJ-1)</b>  | Parkinson's disease                           | Deletion                                                          | Bonifati et al. 2002                    |
| <b>PDHA1</b>         | Pyruvate Dehydrogenase Deficiency             | Exonization                                                       | Larsen et al. 2017                      |
| PIGL                 | CHIME syndrome                                | Deletion                                                          | Knight Johnson et al. 2017              |
| PMM2                 | Congenital disorders of glycosylation type Ia | Complex deletion                                                  | Schollen et al. 2007                    |
| POMT1                | Walker Warburg syndrome                       | Insertion                                                         | Bouchet et al. 2007                     |
| <b>PSEN1</b>         | Alzheimer's disease                           | Deletion                                                          | Le Guennec et al. 2017                  |
| <b>PXMP2 (PMP22)</b> | Charcot-Marie-Tooth type 2A                   | <i>Alu-Alu</i> -mediated rearrangement                            | Choi et al. 2011; Gu et al. 2015        |
| <b>RP2 (NUDT19)</b>  | X-linked retinitis pigmentosa                 | <i>Alu</i> -L1 recombination                                      | Schwahn et al. 1998, Jiang et al. 2017  |
| <b>SLC6A4</b>        | Depression, reduced hippocampal volume        | Altered promoter methylation                                      | Dannlowski et al. 2014                  |
| <b>SLC25AC</b>       | Intellectual disability                       | Deletion                                                          | Vandewalle et al. 2013                  |
| <b>SLC30A6</b>       | Alzheimer's disease, Dementia, ALS            | Gene fusion event                                                 | Boone et al. 2014                       |
| <b>SMN1</b>          | Spinal muscular atrophy                       | Exonization, deletion events, circularization                     | Ottesen et al. 2017                     |
| <b>SOD2</b>          | Hyperglycemia                                 | Repressed expression                                              | Wang et al. 2016                        |
| SOX10                | Waardenburg syndrome type 4                   | Deletion                                                          | Bondurand et al. 2012                   |
| <b>SPAST</b>         | Autosomal-dominant spastic paraplegia 4       | Deletions, CNVs, gene fusion events                               | Boone et al. 2014                       |
| <b>SPG7</b>          | Hereditary spastic paraplegia                 | Deletion, recombination                                           | Arnoldi et al. 2008; López et al. 2015  |
| SPG11                | Hereditary spastic paraplegia                 | Deletion                                                          | Conceição et al. 2012                   |
| STAU1                | Myotonic Dystrophy Type 1                     | Alternative splicing regulation                                   | Bondy-Chorney et al. 2016               |
| <b>TDP-43</b>        | ALS, frontotemporal lobar degeneration        | Transposable element dysregulation                                | Li et al. 2012                          |
| <b>TOMM40</b>        | Late-Onset Alzheimer's Disease                | <i>Alu</i> repeat expansion, putative alternative splicing events | Larsen et al. 2017                      |
| TRIM37               | Mulibrey nanism                               | Deletion events                                                   | Jobic et al. 2017                       |
